# Supplementary material for: Comparative effectiveness and cost-effectiveness of target- versus benefit-based treatment of type 2 diabetes in low- and middle-income countries
Source: PubMed Central journal article supplement — Lancet Diabetes Endocrinol. Author manuscript; Available in PMC 2017 Nov 1. (PMC5315061; doi:10.1016/s2213-8587(16)30270-4), 2016-10-04

# THE LANCET

## Diabetes & Endocrinology

### Supplementary appendix

This appendix formed part of the original submission and has been peer reviewed. We post it as supplied by the authors.

Supplement to: Basu S, Shankar V, Yudkin JS. Comparative effectiveness and cost-effectiveness of treat-to-target versus benefit-based tailored treatment of type 2 diabetes in low-income and middle-income countries: a modelling analysis. *Lancet Diabetes Endocrinol* 2016; published online Oct 4. [http://dx.doi.org/10.1016/S2213-8587\(16\)30270-4](http://dx.doi.org/10.1016/S2213-8587(16)30270-4).

# Appendix

## Table of Contents

|                                                        |    |
|--------------------------------------------------------|----|
| Model overview .....                                   | 1  |
| Medication choices and dose effects on biomarkers..... | 2  |
| Risk reduction from therapy .....                      | 3  |
| Appendix References.....                               | 5  |
| Appendix Table 1.....                                  | 9  |
| Appendix Table 2.....                                  | 12 |
| Appendix Table 3.....                                  | 13 |
| Appendix Table 4.....                                  | 14 |
| Appendix Table 5.....                                  | 15 |
| Appendix Table 6.....                                  | 17 |
| Appendix Table 7.....                                  | 19 |
| Appendix Table 8.....                                  | 21 |
| Appendix Table 9.....                                  | 23 |
| Appendix Table 10.....                                 | 25 |
| Appendix Table 11.....                                 | 27 |
| Appendix Figure 1 .....                                | 29 |
| Appendix Figure 2 .....                                | 30 |
| CHEERS Checklist .....                                 | 31 |

## Model overview

In the simulation, we simulated 100,000 people with type II diabetes based on the age-specific distribution of type II diabetes (**Appendix Table 1**), and assigned each individual baseline risk factor values by repeatedly sampling (with replacement) from the correlated probability distributions of risk factors among their cohort (**Appendix Table 2**),<sup>46</sup> where cohorts were defined by 10-year age group within the range 20 to 70 years old, sex, and either urban or rural residence. We updated risk factors annually to account for aging-related risk factor changes, secular trends in risk factor values, and the process of urbanization or migration to urban areas (**Appendix Table 1**), using a model coding approach that we previously validated and open-sourced.<sup>47</sup> We also used a rank stability coding procedure to update age-specific risk factors for each individual, to prevent survival bias (i.e., we keep an individual within the same quintile of their subgroup in

terms of each risk factor value, as individuals with a high risk factor value are likely to have a high value in the future without further treatment, and die in earlier years of the simulation).<sup>3</sup>

In each annual time step of the simulation, we calculated the annual risk for each of the five diabetes complications for each individual, estimated from previously-published UKPDS Outcomes Model 2 equations, which were chosen due to their extensive international validation, and inclusion of ethnicity-specific parameters.<sup>24,25</sup> Due to copyright restrictions, the equations themselves cannot be reproduced here, but are available online in the cited publication (see the statistical appendix for eTables 4-6 for the specific equations for CVD complications risk, microvascular complications risk, and associated mortality risk, respectively). The equations account for the risk of complications given a simulated individual's biomarker values, incorporating co-dependencies among complications such as the increased risk of cardiovascular complications given renal disease. We used a binomial probability function to simulate whether a person experienced a complication that year given their UKPDS-OM2 risk that year for each complication, and similarly computed mortality following a complication. Mortality from other causes was computed with a binomial probability function using probability of death estimates from the WHO Mortality Database, specific to each age, sex and country (**Appendix Table 3**).<sup>49</sup> Prior history of complications informed future risk of complications and mortality (e.g., we re-computed risk of CVD events and mortality if a patient experienced renal failure, to account for their heightened CVD risk). We subsequently calculated disability-adjusted life-years (DALYs) and total deaths from diabetes complications (accounting for healthcare service availability, **Appendix Table 4**).<sup>39</sup>

## Medication choices and dose effects on biomarkers

### *Blood pressure therapy*

For blood pressure agents, we simulated prescriptions following WHO guidelines,<sup>14</sup> which recommend a thiazide diuretic or angiotensin converting enzyme (ACE) inhibitor for people with diabetes, at standard WHO-recommended dosages (hydrochlorothiazide 25mg per day or enalapril 5mg per day), as dosage adjustment has

small effects on outcomes.<sup>50</sup> Initial drug choice and prescription order between the thiazide and the ACE inhibitor were randomly varied unless a person had microalbuminuria (in which case the ACE inhibitor was chosen first), and second-line choices of two additional agents (a calcium channel blocker [amlodipine 5mg daily], then a beta-blocker [bisoprolol 5mg daily] if needed) were simulated subsequently if necessary to achieve the target. The effect of each drug class on blood pressure was based on a prior meta-analysis of individual randomized trials, and suggested a typical effect of lowering systolic/diastolic blood pressure by 8.8/4.4 mmHg (thiazide, 95% CI: 8.3-9.4/4.0-4.8 mmHg), 8.5/4.7 mmHg (ACE inhibitor, 95% CI: 7.9-9.0/4.4-5.0 mmHg), 8.8/5.9 mmHg (calcium channel blocker, 95% CI: 8.3-9.2/5.6-6.2 mmHg), and 9.2/6.7 mmHg (beta-blocker, 95% CI: 8.3-9.2/5.6-6.2 mmHg).<sup>27</sup>

### *Statin therapy*

Statin prescription was simulated based on a review of data from randomized trials, suggesting a 0.69 mmol/L (SD: 0.29) reduction in LDL with simvastatin 20mg daily, an additional 0.15 mmol/L (SD: 0.06) reduction with dose titration to simvastatin 40mg daily.<sup>32</sup> Atorvastatin and other alternative statins were not simulated given their lack of inclusion on the WHO Essential Medicine list<sup>51</sup>, and their corresponding lack of availability in most low- and middle-income countries.<sup>51</sup>

### *Glucose lowering therapy*

For glucose lowering, metformin 500mg daily was uptitrated to as much as 1000mg twice daily for an A1c reduction ranging linearly with dose titration from 0.5% (SD: 0.2%) to 1.5% (SD: 0.5%), to which the sulfonylurea gliclazide (the sulfonylurea on the WHO Essential Medicine list<sup>51</sup>) was added with doses increasing from 80mg daily to 160mg twice daily for an additional A1c reduction ranging from 0.5% to 1.5% proportional to dose. If the A1c target of <7% was still not achieved, NPH insulin was substituted for the sulfonylurea to achieve the target, with a dose of 0.5 IU/kg body weight (SD: 0.1 IU/kg) to simulate the typical dose required for target achievement.<sup>52</sup>

### *Risk reduction from therapy*

To modify the baseline risk of complications from these equations, we estimated the relative risk reduction from therapy based on meta-analyses of individual patient data from randomized controlled trials, specified below; this strategy was adopted instead of simply altering values of risk factors in the UKPDS OM2 equations, because full reversal of risk is not observed upon therapy.<sup>45</sup>

#### *Blood pressure therapy*

The relative risk reduction from blood pressure therapy for MI and stroke events was based on equations derived and validated previously from meta-analyses of individual patient data from blood pressure reduction trials, in which the relative risk of MI is given by equation 1 and the relative risk of stroke by equation 2 (where  $\Delta SBP$  is the change in systolic blood pressure [final minus initial blood pressure], and age is in years)<sup>29,53</sup>:

$$[1] \quad 2^{\Delta SBP(-1.1009 \times 10^{-5} age^2 + 8.6305 \times 10^{-4} age + 3.5176 \times 10^{-2})}$$

$$[2] \quad 2^{\Delta SBP(-2.5946 \times 10^{-5} age^2 + 2.3052 \times 10^{-3} age + 2.2168 \times 10^{-2})}$$

The relative risk reduction from blood pressure for microvascular events was 0.38 for a 10 mmHg decline in systolic blood pressure.<sup>2</sup>

#### *Statin therapy*

The relative risk reduction for MI and stroke events from statin therapy was 0.33 (95% CI: 0.27, 0.38) for simvastatin 20mg, an additional 0.07 for dose adjustment<sup>24</sup> from simvastatin 20mg to 40mg daily (95% CI: 0.05, 0.09).<sup>32</sup> The relative risk reduction from statin therapy for microvascular events was 0.03 for a 0.1 mmol/L reduction in LDL, with an effect on renal disease but not other microvascular complications.<sup>24</sup>

#### *Glucose lowering therapy*

The relative risk for diabetes complications from glucose lowering therapy was simulated as a log-linear relationship to be consistent with observed risk reductions.<sup>54</sup> Relative risk was based on a meta-analysis of randomized trial outcomes,<sup>19</sup> with an estimated relative risk of 0.87 for non-fatal MI (95% CI: 0.76, 1.00), 0.77 for retinal photocoagulation (95% CI: 0.61, 0.97), 0.64 for amputation of lower extremity (95% CI: 0.43, 0.95), and 0.78 for nephropathy (95% CI: 0.61, 0.99) for a 0.9% reduction in A1c.

## Appendix References

- 1 Hofert M, Mächler M. Nested Archimedean copulas meet R: The nacopula package. *J Stat Softw* 2011; **39**: 1–20.
- 2 Basu S, Goldhaber-Fiebert JD. Quantifying demographic and socioeconomic transitions for computational epidemiology: an open-source modeling approach applied to India. *Popul Health Metr* 2015; **13**: 19.
- 3 Lim SS, Gaziano TA, Gakidou E, *et al*. Prevention of cardiovascular disease in high-risk individuals in low-income and middle-income countries: health effects and costs. *The Lancet* 2007; **370**: 2054–62.
- 4 Hayes AJ, Leal J, Gray AM, Holman RR, Clarke PM. UKPDS outcomes model 2: a new version of a model to simulate lifetime health outcomes of patients with type 2 diabetes mellitus using data from the 30 year United Kingdom Prospective Diabetes Study: UKPDS 82. *Diabetologia* 2013; **56**: 1925–33.
- 5 Clarke P. Constructing diabetes model from individual level data. Stanford University, 2014.
- 6 World Health Organization. World Health Organization Mortality Database. Geneva: WHO, 2014.
- 7 Salomon JA, Vos T, Hogan DR, *et al*. Common values in assessing health outcomes from disease and injury: disability weights measurement study for the Global Burden of Disease Study 2010. *The Lancet* 2013; **380**: 2129–43.
- 8 World Health Organization. Package of Essential Noncommunicable (PEN) Disease Interventions for Primary Health Care in Low-Resource Settings. Geneva: WHO, 2013.
- 9 Chobanian AV, Bakris GL, Black HR, *et al*. The seventh report of the joint national committee on prevention, detection, evaluation, and treatment of high blood pressure: the JNC 7 report. *Jama* 2003; **289**: 2560–71.
- 10 Law MR, Wald NJ, Morris JK, Jordan RE. Value of low dose combination treatment with blood pressure lowering drugs: analysis of 354 randomised trials. *BMJ* 2003; **326**: 1427.
- 11 Hayward RA, Krumholz HM, Zulman DM, Timbie JW, Vijan S. Optimizing statin treatment for primary prevention of coronary artery disease. *Ann Intern Med* 2010; **152**: 69–77.
- 12 World Health Organization WHO. 19th WHO Model List of Essential Medicines. Geneva: WHO, 2015.

- 13 Inzucchi SE. Diabetes facts and guidelines, 11th edn. New Haven: Yale Diabetes Center, 2011.
- 14 Vijan S, Sussman JB, Yudkin JS, Hayward RA. Effect of patients' risks and preferences on health gains with plasma glucose level lowering in type 2 diabetes mellitus. *JAMA Intern Med* 2014; **174**: 1227–34.
- 15 Lewington S, Clarke R, Qizilbash N, Peto R, Collins R, Prospective Studies Collaboration. Age-specific relevance of usual blood pressure to vascular mortality: a meta-analysis of individual data for one million adults in 61 prospective studies. *Lancet* 2002; **360**: 1903–13.
- 16 Smith-Spangler CM, Juusola JL, Enns EA, Owens DK, Garber AM. Population strategies to decrease sodium intake and the burden of cardiovascular disease: a cost-effectiveness analysis. *Ann Intern Med* 2010; **152**: 481–7, W170–3.
- 17 Tight blood pressure control and risk of macrovascular and microvascular complications in type 2 diabetes: UKPDS 38. UK Prospective Diabetes Study Group. *BMJ* 1998; **317**: 703–13.
- 18 Stratton IM, Adler AI, Neil HAW, *et al.* Association of glycaemia with macrovascular and microvascular complications of type 2 diabetes (UKPDS 35): prospective observational study. *Bmj* 2000; **321**: 405–12.
- 19 Hemmingsen B, Lund SS, Gluud C, *et al.* Targeting intensive glycaemic control versus targeting conventional glycaemic control for type 2 diabetes mellitus. *Cochrane Database Syst Rev* 2011; : CD008143.
- 20 United Nations. World Population Prospects: The 2012 Revision. Geneva: UN, 2013.
- 21 Heilig GK. World Urbanization Prospects. New York: United Nations, 2012.
- 22 Guariguata L, Whiting DR, Hambleton I, Beagley J, Linnenkamp U, Shaw JE. Global estimates of diabetes prevalence for 2013 and projections for 2035. *Diabetes Res Clin Pract* 2014; **103**: 137–49.
- 23 International Diabetes Federation. Diabetes Atlas. Brussels: IDF, 2015.
- 24 Danaei G, Finucane MM, Lu Y, *et al.* National, regional, and global trends in fasting plasma glucose and diabetes prevalence since 1980: systematic analysis of health examination surveys and epidemiological studies with 370 country-years and 2·7 million participants. *The Lancet* 2011; **378**: 31–40.
- 25 Kowal P, Chatterji S, Naidoo N, *et al.* Data resource profile: the World Health Organization Study on global AGEing and adult health (SAGE). *Int J Epidemiol* 2012; **41**: 1639–49.

- 26 Gaziano T, Srinath Reddy K, Paccaud F, Horton S, Chaturvedi V. Chapter 33: Cardiovascular disease. In: Disease control priorities in developing countries. World Bank Publications, 2006.  
<https://books.google.com/books?hl=en&lr=&id=Ds93H98Z6D0C&oi=fnd&pg=PR7&dq=gaziano+cost+effectiveness+disease+control+priorities&ots=rhz-WQYCi6&sig=qQTKsD4TF5kA3TWZHKPZJ0ylj0> (accessed May 11, 2015).
- 27 Fowkes FGR, Rudan D, Rudan I, *et al.* Comparison of global estimates of prevalence and risk factors for peripheral artery disease in 2000 and 2010: a systematic review and analysis. *The Lancet* 2013; **382**: 1329–40.
- 28 Wu AYT, Kong NCT, de Leon FA, *et al.* An alarmingly high prevalence of diabetic nephropathy in Asian type 2 diabetic patients: the MicroAlbuminuria Prevalence (MAP) Study. *Diabetologia* 2005; **48**: 17–26.
- 29 Mainland China Microalbuminuria Prevalence Study Group, Du J, Pan C. [A survey of microalbuminuria prevalence in hypertensive type 2 diabetic patients in mainland China]. *Zhonghua Nei Ke Za Zhi* 2007; **46**: 184–8.
- 30 Yan L, Ma J, Guo X, *et al.* Urinary albumin excretion and prevalence of microalbuminuria in a general Chinese population: a cross-sectional study. *BMC Nephrol* 2014; **15**. DOI:10.1186/1471-2369-15-165.
- 31 Popkin BM, Du S, Zhai F, Zhang B. Cohort Profile: The China Health and Nutrition Survey—monitoring and understanding socio-economic and health change in China, 1989–2011. *Int J Epidemiol* 2010; **39**: 1435–40.
- 32 Korsah NN. Prevalence of Renal Impairment in Diabetics with Hypertension in Ghana. 2010. [http://rave.ohiolink.edu/etdc/view?acc\\_num=case1278702992](http://rave.ohiolink.edu/etdc/view?acc_num=case1278702992) (accessed July 12, 2016).
- 33 Arthur FKN, Yeboah FA, Nsiah K, Nkrumah PKN, Afreh KA, Agyenim-Boateng K. Fasting blood glucose and glycosylated haemoglobin levels in randomly selected Ghanaian diabetic patients – the clinical implications. *J Sci Technol Ghana* 2006; **25**: 13–7.
- 34 Eghan BA, Frempong MT, Adjei-Poku M. Prevalence and predictors of microalbuminuria in patients with diabetes mellitus: a cross-sectional observational study in Kumasi, Ghana. *Ethn Dis* 2007; **17**: 726–30.
- 35 Nguyen TN, Hilmer SN, Cumming RG. Review of epidemiology and management of atrial fibrillation in developing countries. *Int J Cardiol* 2013; **167**: 2412–20.
- 36 Basu S, Millett C, Vijan S, *et al.* The health system and population health implications of large-scale diabetes screening in India: a microsimulation model of alternative approaches. *PLOS Med* 2015; **12**: e1001827.



- 37 Ebrahim S, Kinra S, Bowen L, *et al.* The effect of rural-to-urban migration on obesity and diabetes in India: a cross-sectional study. *PLoS Med* 2010; **7**: e1000268.
- 38 Salud Pública de México. <http://bvs.insp.mx/rsp/articulos/articulo.php?id=002478> (accessed July 12, 2016).
- 39 Aguilar-Salinas CA, Monroy OV, Gómez-Pérez FJ, *et al.* Characteristics of Patients With Type 2 Diabetes in México. *Diabetes Care* 2003; **26**: 2021–6.
- 40 Hall V, Thomsen RW, Henriksen O, Lohse N. Diabetes in Sub Saharan Africa 1999-2011: Epidemiology and public health implications. a systematic review. *BMC Public Health* 2011; **11**: 564.
- 41 Management Sciences for Health. International drug price indicator guide. Cambridge, MA: Management Sciences for Health, 2015  
<http://www.msh.org/sites/msh.org/files/international-drug-price-indicator-guide.pdf> (accessed Jan 28, 2015).
- 42 Gaziano TA, Opie LH, Weinstein MC. Cardiovascular disease prevention with a multidrug regimen in the developing world: a cost-effectiveness analysis. *The Lancet* 2006; **368**: 679–86.
- 43 Basu S, Bendavid E, Sood N. Health and Economic Implications of National Treatment Coverage for Cardiovascular Disease in India Cost-Effectiveness Analysis. *Circ Cardiovasc Qual Outcomes* 2015; **8**: 541–51.
- 44 Global Facts: About Kidney Disease. Natl. Kidney Found. 2015; published online Jan 8. <https://www.kidney.org/kidneydisease/global-facts-about-kidney-disease> (accessed July 12, 2016).
- 45 Mushi L, Marschall P, Fleßa S. The cost of dialysis in low and middle-income countries: a systematic review. *BMC Health Serv Res* 2015; **15**. DOI:10.1186/s12913-015-1166-8.
- 46 Patel D, Mercer E, Mason I. Ophthalmic equipment survey 2010. *Community Eye Health J* 2010; **23**: 22–5.
- 47 Brouwer ED, Watkins D, Olson Z, Goett J, Nugent R, Levin C. Provider costs for prevention and treatment of cardiovascular and related conditions in low- and middle-income countries: a systematic review. *BMC Public Health* 2015; **15**: 1183.

**Appendix Table 1**

Estimated population size, distribution, and type II diabetes prevalence, years 2016 and 2025.<sup>20,21,23,38,55</sup> We simulated linear secular trends in each parameter across the simulation period. We estimated type II diabetes prevalence from overall prevalence based on the estimate that 95% of overall diabetes prevalence in the studied populations is type II.<sup>21</sup>

| Country | Age, yrs | Population size, thousands |        |        |        | Rural, % |      | Urban/rural<br>T2DM<br>prevalence<br>ratio | Type II diabetes prevalence, % |        |      |        |
|---------|----------|----------------------------|--------|--------|--------|----------|------|--------------------------------------------|--------------------------------|--------|------|--------|
|         |          | 2016                       |        | 2025   |        | 2016     | 2025 |                                            | 2016                           |        | 2025 |        |
|         |          | Male                       | Female | Male   | Female |          |      |                                            | Male                           | Female | Male | Female |
| China   | 0-4      | 44 734                     | 38 730 | 36 568 | 32 130 | 57.1     | 68.9 | 1.14                                       | 0.0                            | 0.0    | 0.0  | 0.0    |
|         | 5-9      | 42 885                     | 36 742 | 41 942 | 36 538 |          |      |                                            | 0.0                            | 0.0    | 0.0  | 0.0    |
|         | 10-14    | 40 624                     | 35 057 | 44 479 | 38 399 |          |      |                                            | 0.0                            | 0.0    | 0.0  | 0.0    |
|         | 15-19    | 40 589                     | 35 627 | 42 145 | 36 109 |          |      |                                            | 0.0                            | 0.0    | 0.0  | 0.0    |
|         | 20-24    | 52 641                     | 47 064 | 40 001 | 34 615 |          |      |                                            | 0.5                            | 0.3    | 0.6  | 0.3    |
|         | 25-29    | 66 934                     | 61 680 | 41 461 | 36 556 |          |      |                                            | 0.9                            | 1.3    | 1.0  | 1.5    |
|         | 30-34    | 53 975                     | 50 911 | 55 268 | 49 741 |          |      |                                            | 2.3                            | 1.8    | 2.6  | 2.1    |
|         | 35-39    | 47 695                     | 45 304 | 66 245 | 61 478 |          |      |                                            | 4.1                            | 3.6    | 4.8  | 4.2    |
|         | 40-44    | 58 690                     | 55 871 | 50 341 | 47 774 |          |      |                                            | 6.9                            | 6.5    | 8.0  | 7.6    |
|         | 45-49    | 63 389                     | 61 502 | 47 966 | 45 721 |          |      |                                            | 10.2                           | 9.8    | 11.8 | 11.5   |
|         | 50-54    | 53 089                     | 51 277 | 59 383 | 57 005 |          |      |                                            | 14.1                           | 13.8   | 16.3 | 16.2   |
|         | 55-59    | 40 958                     | 39 624 | 60 067 | 59 032 |          |      |                                            | 17.6                           | 17.4   | 20.4 | 20.5   |
|         | 60-64    | 39 522                     | 38 936 | 47 054 | 46 248 |          |      |                                            | 19.6                           | 19.8   | 22.7 | 23.3   |
|         | 65-69    | 27 399                     | 27 799 | 35 068 | 35 259 |          |      |                                            | 21.5                           | 21.1   | 25.0 | 24.8   |
| 70-74   | 17 284   | 17 700                     | 30 739 | 32 449 | 23.0   | 22.0     | 26.7 | 25.9                                       |                                |        |      |        |
| 75-79   | 11 703   | 12 682                     | 16 586 | 18 982 | 24.3   | 23.0     | 28.1 | 27.0                                       |                                |        |      |        |
| Ghana   | 0-4      | 2 116                      | 2 025  | 2 192  | 2 099  | 54.8     | 60.8 | 1.10                                       | 0.0                            | 0.0    | 0.0  | 0.0    |
|         | 5-9      | 1 828                      | 1 753  | 2 095  | 2 011  |          |      |                                            | 0.0                            | 0.0    | 0.0  | 0.0    |
|         | 10-14    | 1 610                      | 1 542  | 2 006  | 1 923  |          |      |                                            | 0.0                            | 0.0    | 0.0  | 0.0    |
|         | 15-19    | 1 436                      | 1 374  | 1 746  | 1 673  |          |      |                                            | 0.0                            | 0.0    | 0.0  | 0.0    |

|        |       |        |        |        |        |      |      |      |      |      |      |      |
|--------|-------|--------|--------|--------|--------|------|------|------|------|------|------|------|
|        | 20-24 | 1 323  | 1 271  | 1 529  | 1 468  |      |      |      | 0.2  | 0.1  | 0.3  | 0.2  |
|        | 25-29 | 1 149  | 1 151  | 1 350  | 1 301  |      |      |      | 0.3  | 0.4  | 0.4  | 0.7  |
|        | 30-34 | 971    | 1 046  | 1 236  | 1 202  |      |      |      | 0.8  | 0.6  | 1.1  | 1.0  |
|        | 35-39 | 813    | 900    | 1 057  | 1 081  |      |      |      | 1.4  | 1.2  | 2.1  | 2.1  |
|        | 40-44 | 678    | 740    | 887    | 978    |      |      |      | 2.4  | 2.2  | 3.5  | 3.8  |
|        | 45-49 | 564    | 607    | 735    | 825    |      |      |      | 3.5  | 3.4  | 5.2  | 5.7  |
|        | 50-54 | 446    | 478    | 601    | 669    |      |      |      | 4.9  | 4.8  | 7.1  | 8.0  |
|        | 55-59 | 343    | 386    | 482    | 537    |      |      |      | 6.1  | 6.0  | 8.9  | 10.1 |
|        | 60-64 | 248    | 284    | 359    | 405    |      |      |      | 6.8  | 6.8  | 9.9  | 11.5 |
|        | 65-69 | 194    | 210    | 252    | 303    |      |      |      | 7.5  | 7.3  | 10.9 | 12.3 |
|        | 70-74 | 123    | 136    | 158    | 192    |      |      |      | 8.0  | 7.6  | 11.6 | 12.8 |
|        | 75-79 | 69     | 93     | 96     | 112    |      |      |      | 8.4  | 7.9  | 12.3 | 13.4 |
| India  | 0-4   | 64 679 | 58 226 | 64 412 | 58 365 | 33.1 | 36.2 | 1.88 | 0.0  | 0.0  | 0.0  | 0.0  |
|        | 5-9   | 66 672 | 59 810 | 64 683 | 58 306 |      |      |      | 0.0  | 0.0  | 0.0  | 0.0  |
|        | 10-14 | 67 024 | 59 975 | 64 276 | 57 751 |      |      |      | 0.0  | 0.0  | 0.0  | 0.0  |
|        | 15-19 | 65 366 | 58 702 | 66 304 | 59 405 |      |      |      | 0.0  | 0.0  | 0.0  | 0.0  |
|        | 20-24 | 62 558 | 56 476 | 66 036 | 59 031 |      |      |      | 0.6  | 0.3  | 0.8  | 0.4  |
|        | 25-29 | 59 341 | 54 525 | 63 757 | 57 353 |      |      |      | 1.0  | 1.5  | 1.2  | 1.7  |
|        | 30-34 | 55 057 | 51 068 | 60 635 | 55 129 |      |      |      | 2.6  | 2.1  | 3.2  | 2.4  |
|        | 35-39 | 48 318 | 45 201 | 57 091 | 53 138 |      |      |      | 4.8  | 4.2  | 5.7  | 4.8  |
|        | 40-44 | 42 591 | 40 086 | 52 132 | 49 141 |      |      |      | 8.1  | 7.5  | 9.7  | 8.7  |
|        | 45-49 | 37 259 | 35 343 | 44 930 | 42 966 |      |      |      | 11.9 | 11.4 | 14.3 | 13.2 |
|        | 50-54 | 32 477 | 31 069 | 39 029 | 37 790 |      |      |      | 16.4 | 16.0 | 19.7 | 18.5 |
|        | 55-59 | 27 416 | 26 535 | 33 114 | 32 628 |      |      |      | 20.6 | 20.3 | 24.6 | 23.4 |
|        | 60-64 | 22 354 | 21 937 | 27 531 | 27 601 |      |      |      | 22.9 | 23.1 | 27.4 | 26.7 |
|        | 65-69 | 14 994 | 15 548 | 21 422 | 21 921 |      |      |      | 25.2 | 24.6 | 30.1 | 28.4 |
|        | 70-74 | 9 859  | 10 748 | 15 241 | 16 068 |      |      |      | 26.9 | 25.6 | 32.2 | 29.6 |
|        | 75-79 | 6 269  | 7 284  | 8 350  | 9 530  |      |      |      | 28.3 | 26.8 | 34.0 | 30.9 |
| Mexico | 0-4   | 5 939  | 5 694  | 5 615  | 5 370  | 79.6 | 82.2 | 1.81 | 0.0  | 0.0  | 0.0  | 0.0  |
|        | 5-9   | 5 916  | 5 654  | 5 786  | 5 542  |      |      |      | 0.0  | 0.0  | 0.0  | 0.0  |

|              |       |       |       |       |       |      |      |      |      |      |      |      |
|--------------|-------|-------|-------|-------|-------|------|------|------|------|------|------|------|
|              | 10-14 | 5 999 | 5 776 | 5 882 | 5 639 |      |      |      | 0.0  | 0.0  | 0.0  | 0.0  |
|              | 15-19 | 6 049 | 5 870 | 5 849 | 5 611 |      |      |      | 0.0  | 0.0  | 0.0  | 0.0  |
|              | 20-24 | 5 821 | 5 655 | 5 893 | 5 719 |      |      |      | 1.1  | 0.6  | 1.2  | 0.7  |
|              | 25-29 | 5 409 | 5 282 | 5 874 | 5 759 |      |      |      | 1.7  | 2.5  | 2.0  | 2.8  |
|              | 30-34 | 4 946 | 4 993 | 5 588 | 5 495 |      |      |      | 4.5  | 3.5  | 5.0  | 4.0  |
|              | 35-39 | 4 598 | 4 783 | 5 170 | 5 137 |      |      |      | 8.1  | 7.1  | 9.2  | 8.0  |
|              | 40-44 | 4 276 | 4 480 | 4 725 | 4 874 |      |      |      | 13.6 | 12.7 | 15.4 | 14.4 |
|              | 45-49 | 3 738 | 3 872 | 4 390 | 4 648 |      |      |      | 20.1 | 19.3 | 22.8 | 21.9 |
|              | 50-54 | 2 963 | 3 202 | 4 022 | 4 273 |      |      |      | 27.7 | 27.1 | 31.4 | 30.7 |
|              | 55-59 | 2 405 | 2 643 | 3 403 | 3 592 |      |      |      | 34.6 | 34.2 | 39.2 | 38.8 |
|              | 60-64 | 1 973 | 2 151 | 2 607 | 2 906 |      |      |      | 38.6 | 39.0 | 43.7 | 44.2 |
|              | 65-69 | 1 412 | 1 482 | 2 059 | 2 325 |      |      |      | 42.4 | 41.6 | 48.0 | 47.1 |
|              | 70-74 | 1 046 | 1 130 | 1 568 | 1 771 |      |      |      | 45.2 | 43.3 | 51.3 | 49.1 |
|              | 75-79 | 692   | 801   | 999   | 1 106 |      |      |      | 47.7 | 45.2 | 54.1 | 51.3 |
| South Africa | 0-4   | 2 622 | 2 620 | 2 574 | 2 516 | 65.4 | 70.1 | 2.00 | 0.0  | 0.0  | 0.0  | 0.0  |
|              | 5-9   | 2 838 | 2 728 | 2 656 | 2 607 |      |      |      | 0.0  | 0.0  | 0.0  | 0.0  |
|              | 10-14 | 2 548 | 2 552 | 2 662 | 2 627 |      |      |      | 0.0  | 0.0  | 0.0  | 0.0  |
|              | 15-19 | 2 811 | 2 431 | 2 731 | 2 652 |      |      |      | 0.0  | 0.0  | 0.0  | 0.0  |
|              | 20-24 | 2 743 | 2 515 | 2 480 | 2 472 |      |      |      | 0.6  | 0.3  | 0.8  | 0.4  |
|              | 25-29 | 2 765 | 2 602 | 2 791 | 2 381 |      |      |      | 1.0  | 1.2  | 1.3  | 1.5  |
|              | 30-34 | 2 387 | 2 404 | 2 611 | 2 407 |      |      |      | 2.5  | 1.7  | 3.3  | 2.1  |
|              | 35-39 | 1 747 | 1 899 | 2 528 | 2 340 |      |      |      | 4.6  | 3.5  | 5.9  | 4.3  |
|              | 40-44 | 1 550 | 1 567 | 2 000 | 2 008 |      |      |      | 7.8  | 6.3  | 9.9  | 7.7  |
|              | 45-49 | 1 435 | 1 374 | 1 416 | 1 534 |      |      |      | 11.5 | 9.6  | 14.7 | 11.7 |
|              | 50-54 | 1 214 | 1 280 | 1 278 | 1 296 |      |      |      | 15.9 | 13.4 | 20.3 | 16.4 |
|              | 55-59 | 881   | 1 131 | 1 135 | 1 154 |      |      |      | 19.8 | 16.9 | 25.3 | 20.7 |
|              | 60-64 | 597   | 923   | 892   | 1 068 |      |      |      | 22.1 | 19.3 | 28.2 | 23.6 |
|              | 65-69 | 347   | 707   | 571   | 892   |      |      |      | 24.3 | 20.6 | 31.0 | 25.2 |
|              | 70-74 | 222   | 488   | 329   | 667   |      |      |      | 25.9 | 21.4 | 33.1 | 26.2 |
|              | 75-79 | 172   | 339   | 151   | 447   |      |      |      | 27.3 | 22.4 | 34.9 | 27.4 |

## Appendix Table 2

Risk factor distribution ranges used for the simulation. For four of the parameters (white blood cell, haemoglobin, congestive heart failure, and peripheral vascular disease) we used the same range in the absence of country-specific data; variations in these covariates produce changes smaller than rounding error in outcome rates. PubMed and Google Scholar were searched with keywords corresponding to the “factor” column and the country name for English-language articles published from Jan 1, 1980, to July 31, 2016.

| Factor                                                  | Range of mean values among age-, sex-, and urban/rural-specific cohorts, used to simulate populations in each country<br>(range of standard deviations within each cohort) |                              |                              |                               |                                  |
|---------------------------------------------------------|----------------------------------------------------------------------------------------------------------------------------------------------------------------------------|------------------------------|------------------------------|-------------------------------|----------------------------------|
|                                                         | China <sup>25-31</sup>                                                                                                                                                     | Ghana <sup>25,27,32-34</sup> | India <sup>25-27,34-37</sup> | Mexico <sup>25,27,38,39</sup> | South Africa <sup>25,27,40</sup> |
| Tobacco smoking (probability)                           | 0.02-0.74<br>(0.12-0.53)                                                                                                                                                   | 0.03-0.40<br>(0.04-0.51)     | 0.04-0.73<br>(0.19-0.63)     | 0.02-0.58<br>(0.14-0.70)      | 0.07-0.48<br>(0.25-0.71)         |
| Body mass index (kg/m <sup>2</sup> )                    | 23.3-30.0<br>(2.7-4.5)                                                                                                                                                     | 19.9-30.1<br>(0.5-6.8)       | 16.3-26.5<br>(1.3-16.2)      | 25.8-33.0<br>(2.5-6.5)        | 29.4-39.1<br>(2.0-8.6)           |
| Haemoglobin A1c (%)                                     | 6.7-8.7<br>(1.5-5.4)                                                                                                                                                       | 6.7-9.7<br>(1.5-1.5)         | 6.4-9.4<br>(1.0-1.5)         | 7.0-9.9<br>(1.5-2.5)          | 6.7-9.7<br>(1.5-1.5)             |
| Systolic blood pressure (mmHg)                          | 125.7-164.0<br>(8.8-34.6)                                                                                                                                                  | 118.5-179.4<br>(8.4-45.0)    | 111.2-153.4<br>(4.3-38.3)    | 126.0-160.1<br>(3.1-49.0)     | 130.2-154.3<br>(11.8-39.1)       |
| High-density lipoprotein (mmol/L)                       | 0.9-2.0<br>(0.3-0.5)                                                                                                                                                       | 0.9-1.5<br>(0.3-0.3)         | 1.0-1.4<br>(0.3-0.3)         | 0.9-1.5<br>(0.3-0.3)          | 0.9-1.5<br>(0.3-0.3)             |
| Low-density lipoprotein (mmol/L)                        | 1.9-3.9<br>(0.6-1.0)                                                                                                                                                       | 2.4-3.6<br>(0.6-0.6)         | 2.6-3.6<br>(0.6-0.7)         | 2.4-3.6<br>(0.6-0.6)          | 2.4-3.6<br>(0.6-0.6)             |
| Heart rate (beats/minute)                               | 73.9-86.0<br>(8.9-23.5)                                                                                                                                                    | 72.6-95.8<br>(9.1-27.5)      | 66.2-102.1<br>(5.0-18.8)     | 64.2-96.6<br>(4.8-18.2)       | 74.8-84.8<br>(2.7-16.0)          |
| Glomerular filtration rate (ml/min/1.73m <sup>2</sup> ) | 65.7-112.3<br>(15.0-23.3)                                                                                                                                                  | 62.5-92.5<br>(15.0-15.0)     | 62.5-100.2<br>(15.0-24.3)    | 62.5-92.5<br>(15.0-15.0)      | 62.5-92.5<br>(15.0-15.0)         |
| White blood cell (x10 <sup>9</sup> /L)                  | 5.0-8.6<br>(1.8-1.8)                                                                                                                                                       | 5.0-8.6<br>(1.8-1.8)         | 5.0-8.6<br>(1.8-1.8)         | 5.0-8.6<br>(1.8-1.8)          | 5.0-8.6<br>(1.8-1.8)             |
| Haemoglobin (g/dL)                                      | 13.2-15.8<br>(1.3-1.3)                                                                                                                                                     | 13.2-15.8<br>(1.3-1.3)       | 13.2-15.8<br>(1.3-1.3)       | 13.2-15.8<br>(1.3-1.3)        | 13.2-15.8<br>(1.3-1.3)           |
| Congestive heart failure (probability)                  | 0.00-0.03<br>(0.00-0.01)                                                                                                                                                   | 0.00-0.03<br>(0.00-0.01)     | 0.00-0.03<br>(0.00-0.01)     | 0.00-0.03<br>(0.00-0.01)      | 0.00-0.03<br>(0.00-0.01)         |
| Peripheral vascular disease (probability)               | 1.2-14.6<br>(0.6-3.7)                                                                                                                                                      | 1.2-14.6<br>(0.6-3.7)        | 1.2-14.6<br>(0.6-3.7)        | 1.2-14.6<br>(0.6-3.7)         | 1.2-14.6<br>(0.6-3.7)            |
| Albuminuria (probability)                               | 0.14-0.49<br>(0.17-0.17)                                                                                                                                                   | 0.33-0.53<br>(0.05-0.05)     | 0.23-0.39<br>(0.08-0.08)     | 0.05-0.64<br>(0.30-0.30)      | 0.20-0.65<br>(0.22-0.22)         |
| Atrial fibrillation (probability)                       | 0.000-0.010<br>(0.000-0.002)                                                                                                                                               | 0.000-0.007<br>(0.000-0.002) | 0.000-0.001<br>(0.000-0.001) | 0.000-0.015<br>(0.000-0.003)  | 0.000-0.007<br>(0.000-0.002)     |

### Appendix Table 3

Probability of all-cause mortality by age and sex;<sup>49</sup> mortality specific to each diabetes complication was estimated by the UKPDS OM2 equations, using ethnicity-specific parameters as relevant for each country.<sup>24</sup> The equations account for both immediate and longer-term mortality from diabetes complications.

| Age group, yrs | Probability of death by age |        |       |        |       |        |        |        |              |        |
|----------------|-----------------------------|--------|-------|--------|-------|--------|--------|--------|--------------|--------|
|                | China                       |        | Ghana |        | India |        | Mexico |        | South Africa |        |
|                | Male                        | Female | Male  | Female | Male  | Female | Male   | Female | Male         | Female |
| <1 year        | 0.011                       | 0.012  | 0.042 | 0.052  | 0.043 | 0.042  | 0.012  | 0.015  | 0.029        | 0.036  |
| 1-4 years      | 0.002                       | 0.002  | 0.023 | 0.024  | 0.014 | 0.011  | 0.002  | 0.002  | 0.011        | 0.012  |
| 5-9 years      | 0.002                       | 0.002  | 0.017 | 0.017  | 0.006 | 0.006  | 0.001  | 0.001  | 0.005        | 0.007  |
| 10-14 years    | 0.001                       | 0.001  | 0.010 | 0.010  | 0.004 | 0.004  | 0.001  | 0.002  | 0.004        | 0.007  |
| 15-19 years    | 0.002                       | 0.002  | 0.011 | 0.014  | 0.007 | 0.006  | 0.003  | 0.006  | 0.008        | 0.010  |
| 20-24 years    | 0.003                       | 0.003  | 0.014 | 0.019  | 0.009 | 0.010  | 0.003  | 0.010  | 0.019        | 0.014  |
| 25-29 years    | 0.003                       | 0.003  | 0.017 | 0.020  | 0.009 | 0.012  | 0.003  | 0.012  | 0.036        | 0.026  |
| 30-34 years    | 0.003                       | 0.004  | 0.019 | 0.022  | 0.010 | 0.015  | 0.004  | 0.014  | 0.049        | 0.043  |
| 35-39 years    | 0.004                       | 0.005  | 0.024 | 0.027  | 0.012 | 0.021  | 0.006  | 0.016  | 0.057        | 0.068  |
| 40-44 years    | 0.007                       | 0.009  | 0.027 | 0.031  | 0.015 | 0.027  | 0.008  | 0.019  | 0.044        | 0.077  |
| 45-49 years    | 0.011                       | 0.015  | 0.033 | 0.039  | 0.022 | 0.038  | 0.014  | 0.025  | 0.045        | 0.091  |
| 50-54 years    | 0.017                       | 0.024  | 0.044 | 0.055  | 0.032 | 0.055  | 0.022  | 0.036  | 0.052        | 0.103  |
| 55-59 years    | 0.029                       | 0.043  | 0.057 | 0.070  | 0.053 | 0.081  | 0.035  | 0.052  | 0.067        | 0.125  |
| 60-64 years    | 0.051                       | 0.074  | 0.085 | 0.102  | 0.090 | 0.128  | 0.056  | 0.076  | 0.092        | 0.178  |
| 65-69 years    | 0.089                       | 0.123  | 0.132 | 0.151  | 0.142 | 0.194  | 0.082  | 0.111  | 0.134        | 0.249  |
| 70-74 years    | 0.150                       | 0.199  | 0.209 | 0.229  | 0.224 | 0.270  | 0.127  | 0.170  | 0.196        | 0.338  |
| 75-79 years    | 0.244                       | 0.306  | 0.323 | 0.346  | 0.315 | 0.373  | 0.195  | 0.252  | 0.277        | 0.437  |
| 80-84 years    | 0.397                       | 0.469  | 0.490 | 0.520  | 0.432 | 0.474  | 0.288  | 0.344  | 0.404        | 0.457  |
| 85-89 years    | 0.573                       | 0.637  | 0.701 | 0.716  | 0.534 | 0.563  | 0.416  | 0.462  | 0.508        | 0.558  |
| 90-94 years    | 0.782                       | 0.826  | 0.930 | 0.947  | 0.642 | 0.654  | 0.577  | 0.609  | 0.638        | 0.677  |
| 95-99 years    | 0.898                       | 0.916  | 0.969 | 0.975  | 0.743 | 0.739  | 0.761  | 0.775  | 0.780        | 0.798  |
| 100+ years     | 1.000                       | 1.000  | 1.000 | 1.000  | 1.000 | 1.000  | 1.000  | 1.000  | 1.000        | 1.000  |

## Appendix Table 4

Cost-effectiveness input data.<sup>19,39,40,71-75</sup> Costs are in 2016 US Dollars.

| Parameter                                              | Input values<br>(95% CI)                       |
|--------------------------------------------------------|------------------------------------------------|
| <b>Blood pressure treatment</b>                        |                                                |
| Hydrochlorothiazide 25mg                               | \$3.43/person/yr (\$1.5, \$14.16)              |
| Enalapril 5mg                                          | \$6.02/person/yr (\$3.03, \$10.33)             |
| Amlodipine 5mg                                         | \$3.43/person/yr (\$1.17, \$14.86)             |
| Bisoprolol 5mg                                         | \$24.09/person/yr (\$18.18, \$30.04)           |
| <b>Statin treatment</b>                                |                                                |
| Simvastatin 20mg                                       | \$8.94/person/yr (\$3.65, \$53.62)             |
| <b>Glucose treatment</b>                               |                                                |
| Metformin 1000mg                                       | \$8.06/person/yr (\$7.81, \$25.11)             |
| Gliclazide 80mg                                        | \$16.61/person/yr (\$14.97, \$18.25)           |
| NPH insulin + supplies*                                | \$326.42/person/yr (\$309.96, \$407.4)         |
| <b>Medical service costs</b>                           |                                                |
| blood pressure, monitoring and drug titration          | \$12.00/person/yr (\$6, \$24)                  |
| lipid testing, monitoring and drug titration           | \$30.00/person/yr (\$15, \$60)                 |
| haemoglobin A1c testing, monitoring and drug titration | \$105.00/person/yr (\$58, \$210)               |
| MI acute event care                                    | \$645.00/event (\$322.5, \$1290)               |
| MI post-event annual care                              | \$79.00/person/yr (\$39.5, \$158)              |
| Stroke acute event care                                | \$883.00/event (\$441.5, \$1766)               |
| Stroke post-event annual care                          | \$795.00/person/yr (\$397.5, \$1590)           |
| ESRD dialysis**                                        | \$19,930.20/person/yr (\$16124.36, \$27270.07) |
| Photocoagulation services***                           | \$196.95/event (\$98.48, \$393.9)              |
| Ulcer care and management**                            | \$585.60/event (\$292.8, \$1171.2)             |
| Amputation care and management**                       | \$2,909.77/event (\$1406.87, \$7480.87)        |
| <b>Disability weights</b>                              |                                                |
| MI, days 1-2                                           | 0.422 (0.284, 0.560)                           |
| MI, days 3-28                                          | 0.056 (0.035, 0.082)                           |
| Stroke, mild <sup>†</sup>                              | 0.021 (0.011, 0.037)                           |
| Stroke, moderate                                       | 0.076 (0.050, 0.110)                           |
| Stroke, moderate with cognitive involvement            | 0.312 (0.211, 0.433)                           |
| Stroke, severe                                         | 0.539 (0.363, 0.705)                           |
| Stroke, severe with cognitive involvement              | 0.567 (0.394, 0.738)                           |
| Distance vision blindness                              | 0.195 (0.132, 0.272)                           |
| Near vision impairment <sup>‡</sup>                    | 0.013 (0.006, 0.024)                           |
| End-stage renal disease                                | 0.573 (0.397, 0.749)                           |
| Diabetic neuropathy <sup>§</sup>                       | 0.099 (0.066, 0.145)                           |
| Amputation of one leg, long-term with treatment        | 0.021 (0.011, 0.035)                           |
| Amputation of one leg, long-term without treatment     | 0.164 (0.111, 0.229)                           |

\* insulin supplies include syringes, needles, glucometer (last ~3yrs per meter), test strips, and lancets

\*\* proper long-term treatment available to approximately 10% of the affected population

\*\*\* available to approximately 35% of the affected population

<sup>†</sup> the distribution among stroke types was assumed to be equal

<sup>‡</sup> both near-vision and distance vision were assumed to be impaired among patients experiencing blindness

<sup>§</sup> for ulcer, neuropathy disability was included, as well as a 10% probability of treatment, with progression to amputation if untreated

### Appendix Table 5

Lowering the threshold for treating microvascular risk under the BTT strategy from the base case of 5% lifetime risk to 3% lifetime risk. See **Appendix Figure 2** for an illustration of how microvascular complications prevented vary with BTT treatment threshold choices.

|                                                                                                            | China<br>(type II diabetes prevalence ~9.3%) |                       | Ghana<br>(type II diabetes prevalence ~2.2%) |                         | India<br>(type II diabetes prevalence ~8.8%) |                         | Mexico<br>(type II diabetes prevalence ~15.0%) |                         | South Africa<br>(type II diabetes prevalence ~7.2%) |                         |
|------------------------------------------------------------------------------------------------------------|----------------------------------------------|-----------------------|----------------------------------------------|-------------------------|----------------------------------------------|-------------------------|------------------------------------------------|-------------------------|-----------------------------------------------------|-------------------------|
|                                                                                                            | TTT                                          | BTT                   | TTT                                          | BTT                     | TTT                                          | BTT                     | TTT                                            | BTT                     | TTT                                                 | BTT                     |
| Adults with type II diabetes recommended any treatment, %:                                                 | 99.1 (99, 99.1)                              | 99.8 (99.8, 99.9)     | 99.4 (99.3, 99.4)                            | 99.9 (99.9, 99.9)       | 99.3 (99.2, 99.4)                            | 99.9 (99.9, 99.9)       | 99.2 (99.2, 99.3)                              | 99.8 (99.8, 99.8)       | 99.3 (99.2, 99.3)                                   | 99.9 (99.9, 99.9)       |
| Blood pressure treatment                                                                                   | 80.5 (80.3, 80.6)                            | 82.5 (82.2, 82.7)     | 86.4 (86.3, 86.6)                            | 81 (80.9, 81.1)         | 85.4 (85.2, 85.5)                            | 84.4 (84.2, 84.7)       | 84.1 (83.9, 84.2)                              | 82.3 (82.2, 82.6)       | 84.1 (83.8, 84.3)                                   | 82.8 (82.7, 82.9)       |
| Lipid treatment                                                                                            | 75.2 (75.1, 75.5)                            | 82.8 (82.5, 83)       | 75.4 (75.2, 75.6)                            | 81.2 (81, 81.3)         | 75.3 (75.1, 75.6)                            | 84.6 (84.3, 84.9)       | 75.3 (75.2, 75.5)                              | 82.5 (82.4, 82.8)       | 75.3 (75, 75.5)                                     | 83 (82.8, 83.1)         |
| Glycaemic treatment                                                                                        | 80.7 (80.5, 80.9)                            | 99.7 (99.7, 99.7)     | 80.7 (80.6, 80.9)                            | 99.8 (99.8, 99.8)       | 80.7 (80.6, 80.9)                            | 99.9 (99.8, 99.9)       | 80.7 (80.5, 80.9)                              | 99.7 (99.7, 99.7)       | 80.8 (80.6, 81)                                     | 99.8 (99.8, 99.8)       |
| Insulin treatment                                                                                          | 13.8 (13.7, 13.9)                            | 18.1 (18.0, 18.3)     | 13.8 (13.7, 14.0)                            | 18.8 (18.6, 19.0)       | 13.8 (13.7, 14.0)                            | 20.2 (20.1, 20.4)       | 13.8 (13.5, 13.9)                              | 17.5 (17.3, 17.6)       | 13.8 (13.7, 14.0)                                   | 16.7 (16.6, 16.8)       |
| number of medications, per person recommended treatment                                                    | 3.0 (3.0, 3.1)                               | 3.8 (3.8, 3.8)        | 3.3 (3.3, 3.3)                               | 3.7 (3.7, 3.7)          | 3.2 (3.2, 3.3)                               | 3.8 (3.8, 3.8)          | 3.2 (3.2, 3.2)                                 | 3.7 (3.7, 3.8)          | 3.2 (3.2, 3.2)                                      | 3.8 (3.8, 3.8)          |
| <b>CVD events prevented per 100,000 people with type II diabetes from 10 years of treatment:</b>           |                                              |                       |                                              |                         |                                              |                         |                                                |                         |                                                     |                         |
| MI                                                                                                         | 2098.4 (2005.4, 2146.1)                      | 3247.3 (3179.5, 3342) | 2206.5 (2133.2, 2268.7)                      | 3081.9 (3059.6, 3241.8) | 2290.4 (2229.6, 2356)                        | 3419.3 (3339.9, 3493.6) | 2201.1 (2125.5, 2311.4)                        | 3248.6 (3169.9, 3354.8) | 2200.8 (2111.3, 2309.9)                             | 3277.9 (3232.7, 3348.8) |
| Stroke                                                                                                     | 1857.3 (1771.5, 1914.8)                      | 2863.5 (2911, 2951.6) | 1885.3 (1790.5, 1966.0)                      | 2603.5 (2575.1, 2702.6) | 2054.4 (1986.8, 2134.1)                      | 2991.5 (2860.8, 3086.0) | 1932 (1886, 1982.2)                            | 2821.6 (2777.4, 2843.8) | 1941.5 (1881.5, 1995.6)                             | 2890.0 (2858.5, 2911.0) |
| <b>Microvascular events prevented per 100,000 people with type II diabetes from 10 years of treatment:</b> |                                              |                       |                                              |                         |                                              |                         |                                                |                         |                                                     |                         |
| Blindness                                                                                                  | 229.4 (214.2, 240.0)                         | 306.9 (298.8, 329.4)  | 244.1 (228.0, 264.8)                         | 309.1 (287.5, 335.7)    | 238.2 (219.6, 270.0)                         | 321.5 (297.9, 338.0)    | 225.2 (205.6, 242.9)                           | 300.3 (274.6, 364.8)    | 222.3 (204.9, 243.7)                                | 299.1 (279, 322.7)      |



|                                                                                     |                                  |                               |                              |                                  |                                |                                  |                                  |                               |                                  |                                  |
|-------------------------------------------------------------------------------------|----------------------------------|-------------------------------|------------------------------|----------------------------------|--------------------------------|----------------------------------|----------------------------------|-------------------------------|----------------------------------|----------------------------------|
| End-stage renal disease                                                             | 764 (731.1, 799.2)               | 888.4 (844, 936.8)            | 833.5 (813.3, 862.9)         | 967.1 (927.9, 997.4)             | 973.7 (936.2, 1020.1)          | 1115.6 (1080.4, 1164.6)          | 705.4 (675.4, 736.4)             | 815.8 (797.7, 919.4)          | 590.0 (559, 614.6)               | 711.0 (672.3, 765.7)             |
| Ulcer                                                                               | 265.3 (238.7, 286.0)             | 265.7 (247.1, 300.5)          | 261.8 (239.1, 295.5)         | 252 (226.4, 269.8)               | 220.6 (198.7, 256)             | 202.5 (187.4, 219.2)             | 306.1 (258.0, 345.1)             | 307.5 (308.7, 320.2)          | 411.9 (369.9, 442.6)             | 412.8 (381.2, 452.8)             |
| Deaths averted per 100,000 people with type II diabetes from 10 years of treatment: | 1409.8 (1346.0, 1454.3)          | 2056.3 (2040.4, 2126.7)       | 1467.9 (1409.6, 1522.3)      | 1965.1 (1935.5, 2029)            | 1596.8 (1545.0, 1657.7)        | 2227.8 (2148, 2293.6)            | 1439.3 (1394.2, 1493.5)          | 2021.5 (1982.2, 2081.2)       | 1404.5 (1351.1, 1457.3)          | 2025.4 (1989.4, 2059.7)          |
| Number needed to treat to prevent one CVD event                                     | 25 (24.4, 26.2)                  | 16.3 (15.9, 16.4)             | 24.3 (23.5, 25.3)            | 17.6 (16.8, 17.7)                | 22.9 (22.1, 23.5)              | 15.6 (15.2, 16.1)                | 24 (23.1, 24.7)                  | 16.4 (16.1, 16.8)             | 24 (23.1, 24.8)                  | 16.2 (16, 16.4)                  |
| Number needed to treat to prevent one microvascular event                           | 64 (60.8, 67.8)                  | 56.4 (52.8, 59.2)             | 74.2 (69.8, 77.6)            | 53 (50.6, 56.1)                  | 69.3 (64.3, 73.3)              | 51.5 (49.2, 53.8)                | 80.2 (74.9, 87.1)                | 57.8 (51.5, 59.5)             | 81.1 (76.3, 87.5)                | 58.2 (53.8, 62)                  |
| <b>Cost and cost-effectiveness:</b>                                                 |                                  |                               |                              |                                  |                                |                                  |                                  |                               |                                  |                                  |
| Total costs, per capita per year, \$US 2016                                         | \$891.1 (\$876.6, \$906.7)       | \$888 (\$879.5, \$906.8)      | \$725.4 (\$717.4, \$735.8)   | \$725.8 (\$718.7, \$743.7)       | \$952.6 (\$946.8, \$959)       | \$953.1 (\$952.8, \$963.4)       | \$1020.1 (\$1005.3, \$1035.6)    | \$1014.9 (\$998.2, \$1040.8)  | \$517.6 (\$513.3, \$522.7)       | \$513.5 (\$511, \$518.9)         |
| Total DALYs averted, per capita per year                                            | 0.085 (0.083, 0.087)             | 0.123 (0.121, 0.126)          | 0.043 (0.042, 0.045)         | 0.06 (0.06, 0.062)               | 0.063 (0.062, 0.065)           | 0.089 (0.088, 0.091)             | 0.093 (0.091, 0.095)             | 0.128 (0.126, 0.13)           | 0.031 (0.031, 0.032)             | 0.048 (0.047, 0.049)             |
| \$/DALYs averted (average cost-effectiveness, compared to no treatment)             | \$10448.7 (\$10353.1, \$10514.3) | \$7248.6 (\$7123.4, \$7303.1) | \$16710.4 (\$16327, \$17094) | \$12034.2 (\$11791.4, \$12222.8) | \$15124.1 (\$14800.2, \$15385) | \$10652.0 (\$10555.0, \$10796.6) | \$11019.0 (\$10897.4, \$11062.4) | \$7961.4 (\$7814.0, \$8045.9) | \$16448.0 (\$16168.6, \$16728.4) | \$11073.9 (\$10892.2, \$11096.1) |
| Incremental cost-effectiveness of shifting from TTT to BTT                          | \$-81.6 (-91.2, -72.1)           |                               | \$23.5 (20, 26.7)            |                                  | \$19.2 (17.2, 21.7)            |                                  | \$-148.6 (-167.7, -133.3)        |                               | \$-241.2 (-273.3, -227.8)        |                                  |

Appendix Table 6

Increasing the threshold for treating microvascular risk under the BTT strategy from the base case of 5% lifetime risk to 7% lifetime risk. See **Appendix Figure 2** for an illustration of how microvascular complications prevented vary with BTT treatment threshold choices.

|                                                                                                            | China<br>(type II diabetes prevalence ~9.3%) |                         | Ghana<br>(type II diabetes prevalence ~2.2%) |                         | India<br>(type II diabetes prevalence ~8.8%) |                         | Mexico<br>(type II diabetes prevalence ~15.0%) |                         | South Africa<br>(type II diabetes prevalence ~7.2%) |                         |
|------------------------------------------------------------------------------------------------------------|----------------------------------------------|-------------------------|----------------------------------------------|-------------------------|----------------------------------------------|-------------------------|------------------------------------------------|-------------------------|-----------------------------------------------------|-------------------------|
|                                                                                                            | TTT                                          | BTT                     | TTT                                          | BTT                     | TTT                                          | BTT                     | TTT                                            | BTT                     | TTT                                                 | BTT                     |
| Adults with type II diabetes recommended any treatment, %:                                                 | 99.1 (99, 99.1)                              | 93.3 (93.2, 93.4)       | 99.4 (99.3, 99.4)                            | 93.2 (93.1, 93.4)       | 99.3 (99.2, 99.4)                            | 95.2 (95.1, 95.3)       | 99.2 (99.2, 99.3)                              | 92.6 (92.4, 92.8)       | 99.3 (99.2, 99.3)                                   | 92.2 (92, 92.4)         |
| Blood pressure treatment                                                                                   | 80.5 (80.3, 80.6)                            | 82.5 (82.2, 82.7)       | 86.4 (86.3, 86.6)                            | 81 (80.8, 81.1)         | 85.4 (85.2, 85.5)                            | 84.4 (84.2, 84.5)       | 84.1 (83.9, 84.2)                              | 82.3 (82.1, 82.5)       | 84.1 (83.8, 84.3)                                   | 82.7 (82.5, 82.8)       |
| Lipid treatment                                                                                            | 75.2 (75.1, 75.5)                            | 82.8 (82.6, 83)         | 75.4 (75.2, 75.6)                            | 81.2 (81, 81.4)         | 75.3 (75.1, 75.6)                            | 84.5 (84.4, 84.7)       | 75.3 (75.2, 75.5)                              | 82.5 (82.4, 82.7)       | 75.3 (75, 75.5)                                     | 82.9 (82.8, 83.2)       |
| Glycaemic treatment                                                                                        | 80.7 (80.5, 80.9)                            | 79.4 (92.7, 92.9)       | 80.7 (80.6, 80.9)                            | 81.4 (93.7, 94)         | 80.7 (80.6, 80.9)                            | 84.5 (95, 95.2)         | 80.7 (80.5, 80.9)                              | 77.6 (91.8, 92.1)       | 80.8 (80.6, 81)                                     | 76.5 (91.7, 92)         |
| Insulin treatment                                                                                          | 13.8 (13.7, 13.9)                            | 14.4 (16.7, 17.1)       | 13.8 (13.7, 14)                              | 15.3 (17.5, 17.9)       | 13.8 (13.7, 14)                              | 17.1 (19.1, 19.4)       | 13.8 (13.5, 13.9)                              | 13.6 (15.9, 16.3)       | 13.8 (13.7, 14)                                     | 12.8 (15.2, 15.5)       |
| number of medications, per person recommended treatment                                                    | 3.0 (3, 3.1)                                 | 3.7 (3.8, 3.8)          | 3.3 (3.3, 3.3)                               | 3.6 (3.7, 3.7)          | 3.2 (3.2, 3.3)                               | 3.8 (3.8, 3.8)          | 3.2 (3.2, 3.2)                                 | 3.6 (3.7, 3.8)          | 3.2 (3.2, 3.2)                                      | 3.7 (3.8, 3.8)          |
| <b>CVD events prevented per 100,000 people with type II diabetes from 10 years of treatment:</b>           |                                              |                         |                                              |                         |                                              |                         |                                                |                         |                                                     |                         |
| MI                                                                                                         | 2098.4 (2005.4, 2146.1)                      | 3190.5 (3111.2, 3256.9) | 2206.5 (2133.2, 2268.7)                      | 3063.7 (2978.8, 3123.6) | 2290.4 (2229.6, 2356)                        | 3361.1 (3329.1, 3448.7) | 2201.1 (2125.5, 2311.4)                        | 3207.2 (3137.8, 3273)   | 2200.8 (2111.3, 2309.9)                             | 3263.5 (3183.5, 3322.4) |
| Stroke                                                                                                     | 1857.3 (1771.5, 1914.8)                      | 2819.3 (2715.3, 2814)   | 1885.3 (1790.5, 1966)                        | 2586.7 (2502.9, 2645.3) | 2054.4 (1986.8, 2134.1)                      | 2943.9 (2853.7, 3042.8) | 1932 (1886, 1982.2)                            | 2746.4 (2685.9, 2801.5) | 1941.5 (1881.5, 1995.6)                             | 2801.3 (2714.7, 2858.4) |
| <b>Microvascular events prevented per 100,000 people with type II diabetes from 10 years of treatment:</b> |                                              |                         |                                              |                         |                                              |                         |                                                |                         |                                                     |                         |
| Blindness                                                                                                  | 229.4 (214.2, 240)                           | 263 (236.7, 282.1)      | 244.1 (228, 264.8)                           | 273.7 (254.4, 294.7)    | 238.2 (219.6, 270)                           | 290.2 (267.5, 311.8)    | 225.2 (205.6, 242.9)                           | 263 (244.5, 289)        | 222.3 (204.9, 243.7)                                | 268.6 (235.8, 293)      |

|                                                                                     |                                  |                               |                                  |                                  |                                |                                  |                                  |                               |                                |                                  |
|-------------------------------------------------------------------------------------|----------------------------------|-------------------------------|----------------------------------|----------------------------------|--------------------------------|----------------------------------|----------------------------------|-------------------------------|--------------------------------|----------------------------------|
| End-stage renal disease                                                             | 764 (731.1, 799.2)               | 875 (835.9, 904.0)            | 833.5 (813.3, 862.9)             | 936.3 (884, 961.7)               | 973.7 (936.2, 1020.1)          | 1105.4 (1050.6, 1147.0)          | 705.4 (675.4, 736.4)             | 791.5 (733.8, 823.8)          | 590 (559, 614.6)               | 664 (627.6, 697.3)               |
| Ulcer                                                                               | 265.3 (238.7, 286)               | 252.1 (230.9, 268.3)          | 261.8 (239.1, 295.5)             | 233 (208, 247.6)                 | 220.6 (198.7, 256)             | 197.7 (167.4, 218.1)             | 306.1 (258, 345.1)               | 275.1 (249.2, 295.6)          | 411.9 (369.9, 442.6)           | 366.6 (333.2, 398.5)             |
| Deaths averted per 100,000 people with type II diabetes from 10 years of treatment: | 1409.8 (1346.0, 1454.3)          | 2047 (1980, 2070.6)           | 1467.9 (1409.6, 1522.3)          | 1946.4 (1885.0, 1987.6)          | 1596.8 (1545.0, 1657.7)        | 2201.5 (2142.9, 2276.5)          | 1439.3 (1394.2, 1493.5)          | 1995.4 (1942.4, 2050.7)       | 1404.5 (1351.1, 1457.3)        | 1974.8 (1912.1, 2042.9)          |
| Number needed to treat to prevent one CVD event                                     | 25 (24.4, 26.2)                  | 15.5 (15.4, 16)               | 24.3 (23.5, 25.3)                | 16.5 (16.2, 17)                  | 22.9 (22.1, 23.5)              | 15.1 (14.7, 15.4)                | 24 (23.1, 24.7)                  | 15.6 (15.3, 15.9)             | 24 (23.1, 24.8)                | 15.2 (14.9, 15.6)                |
| Number needed to treat to prevent one microvascular event                           | 64.0 (60.8, 67.8)                | 59.4 (56.9, 63.1)             | 74.2 (69.8, 77.6)                | 56.2 (54.0, 60.0)                | 69.3 (64.3, 73.3)              | 53.0 (50.4, 56.7)                | 80.2 (74.9, 87.1)                | 61.9 (58.6, 66.9)             | 81.1 (76.3, 87.5)              | 63.7 (59.8, 69.1)                |
| <b>Cost and cost-effectiveness:</b>                                                 |                                  |                               |                                  |                                  |                                |                                  |                                  |                               |                                |                                  |
| Total costs, per capita per year, \$US 2016                                         | \$891.1 (\$876.6, \$906.7)       | \$885.6 (\$862.8, \$895.2)    | \$725.4 (\$717.4, \$735.8)       | \$723.4 (\$715.1, \$728.2)       | \$952.6 (\$946.8, \$959)       | \$950.3 (\$939.7, \$953.3)       | \$1020.1 (\$1005.3, \$1035.6)    | \$1009.8 (\$997.4, \$1015.5)  | \$517.6 (\$513.3, \$522.7)     | \$512.1 (\$504.2, \$515.6)       |
| Total DALYs averted, per capita per year                                            | 0.085 (0.083, 0.087)             | 0.123 (0.120, 0.123)          | 0.043 (0.042, 0.045)             | 0.06 (0.059, 0.061)              | 0.063 (0.062, 0.065)           | 0.088 (0.087, 0.087)             | 0.093 (0.091, 0.095)             | 0.126 (0.124, 0.128)          | 0.031 (0.031, 0.032)           | 0.046 (0.045, 0.047)             |
| \$/DALYs averted (average cost-effectiveness, compared to no treatment)             | \$10448.7 (\$10314.3, \$10453.1) | \$7210.0 (\$7171.3, \$7281.8) | \$16710.4 (\$16327.0, \$17094.0) | \$12118.9 (\$12106.4, \$12206.8) | \$15124.1 (\$14800.2, \$15385) | \$10656.5 (\$10642.1, \$10766.2) | \$11019.0 (\$10897.4, \$11062.4) | \$8036.5 (\$7975.0, \$8085.6) | \$16448 (\$16168.6, \$16728.4) | \$11108.3 (\$11052.3, \$11116.2) |
| Incremental cost-effectiveness of shifting from TTT to BTT                          | \$-144.7 (-166.7, -137.5)        |                               | \$-117.6 (-142.9, -105.3)        |                                  |                                | \$-92 (-104.5, -92)              |                                  | \$-312.1 (-355.2, -278.4)     |                                | \$-366.7 (-423.1, -343.8)        |

## Appendix Table 7

Using fasting plasma glucose (target <7mmol/L, per WHO guidance)<sup>14</sup> rather than haemoglobin A1c to guide TTT treatment.

|                                                                                                            | China<br>(type II diabetes<br>prevalence ~9.3%) |                         | Ghana<br>(type II diabetes<br>prevalence ~2.2%) |                         | India<br>(type II diabetes<br>prevalence ~8.8%) |                         | Mexico<br>(type II diabetes<br>prevalence ~15.0%) |                         | South Africa<br>(type II diabetes<br>prevalence ~7.2%) |                         |
|------------------------------------------------------------------------------------------------------------|-------------------------------------------------|-------------------------|-------------------------------------------------|-------------------------|-------------------------------------------------|-------------------------|---------------------------------------------------|-------------------------|--------------------------------------------------------|-------------------------|
|                                                                                                            | TTT                                             | BTT                     | TTT                                             | BTT                     | TTT                                             | BTT                     | TTT                                               | BTT                     | TTT                                                    | BTT                     |
| Adults with type II diabetes recommended any treatment, %:                                                 | 99.1 (99, 99.1)                                 | 97 (97, 97.1)           | 99.4 (99.3, 99.4)                               | 97.2 (97.1, 97.2)       | 99.3 (99.2, 99.4)                               | 98.1 (98, 98.1)         | 99.2 (99.2, 99.3)                                 | 96.6 (96.4, 96.7)       | 99.3 (99.1, 99.2)                                      | 96.4 (96.4, 96.5)       |
| Blood pressure treatment                                                                                   | 80.5 (80.3, 80.6)                               | 82.5 (82.2, 82.7)       | 86.4 (86.3, 86.6)                               | 81 (80.9, 81.1)         | 85.4 (85.2, 85.5)                               | 84.4 (84.2, 84.5)       | 84.1 (83.9, 84.2)                                 | 82.3 (82.2, 82.5)       | 84.1 (84, 84.4)                                        | 82.7 (82.5, 82.8)       |
| Lipid treatment                                                                                            | 75.2 (75.1, 75.5)                               | 82.8 (82.5, 83)         | 75.4 (75.2, 75.6)                               | 81.2 (81, 81.3)         | 75.3 (75.1, 75.6)                               | 84.5 (84.3, 84.7)       | 75.3 (75.2, 75.5)                                 | 82.5 (82.4, 82.7)       | 75.3 (75.1, 75.5)                                      | 82.9 (82.7, 83)         |
| Glycaemic treatment                                                                                        | 85.6 (75.6, 85.8)                               | 92.8 (92.7, 92.9)       | 85.7 (75.7, 85.8)                               | 93.8 (93.7, 94)         | 85.6 (75.7, 85.8)                               | 95.1 (95, 95.2)         | 85.6 (75.6, 85.8)                                 | 92 (91.8, 92.1)         | 85.7 (78.1, 78.4)                                      | 91.9 (91.7, 92)         |
| Insulin treatment                                                                                          | 14.6 (12.8, 14.7)                               | 16.9 (16.7, 17.1)       | 14.7 (12.9, 14.8)                               | 17.7 (17.5, 17.9)       | 14.7 (12.9, 14.8)                               | 19.3 (19.1, 19.4)       | 14.6 (12.7, 14.8)                                 | 16.1 (15.9, 16.3)       | 14.7 (15.5, 15.9)                                      | 15.3 (15.2, 15.5)       |
| number of medications, per person recommended treatment                                                    | 3.2 (2.9, 3.2)                                  | 3.8 (3.8, 3.8)          | 3.4 (3.2, 3.4)                                  | 3.7 (3.7, 3.7)          | 3.4 (3.1, 3.4)                                  | 3.8 (3.8, 3.8)          | 3.3 (3.1, 3.3)                                    | 3.7 (3.7, 3.8)          | 3.3 (3.2, 3.2)                                         | 3.8 (3.8, 3.8)          |
| <b>CVD events prevented per 100,000 people with type II diabetes from 10 years of treatment:</b>           |                                                 |                         |                                                 |                         |                                                 |                         |                                                   |                         |                                                        |                         |
| MI                                                                                                         | 2098.4 (2005.4, 2146.1)                         | 3218.9 (3145.3, 3299.4) | 2206.5 (2133.2, 2268.7)                         | 3080.9 (3021.6, 3197.7) | 2290.4 (2229.6, 2356)                           | 3390.2 (3334.5, 3471.1) | 2201.1 (2125.5, 2311.4)                           | 3232.2 (3153.8, 3343.7) | 2200.8 (2149.3, 2303.1)                                | 3270.7 (3208.1, 3335.6) |
| Stroke                                                                                                     | 1857.3 (1771.5, 1914.8)                         | 2841.4 (2813.1, 2882.8) | 1885.3 (1790.5, 1966)                           | 2595.1 (2539, 2677.6)   | 2054.4 (1986.8, 2134.1)                         | 2967.7 (2857.3, 3085)   | 1932 (1886, 1982.2)                               | 2784 (2731.7, 2822.7)   | 1941.5 (1900.8, 2005.4)                                | 2850 (2791.2, 2906)     |
| <b>Microvascular events prevented per 100,000 people with type II diabetes from 10 years of treatment:</b> |                                                 |                         |                                                 |                         |                                                 |                         |                                                   |                         |                                                        |                         |
| Blindness                                                                                                  | 231.1 (212.6, 241.8)                            | 303.5 (286.5, 327.1)    | 245.9 (226.3, 266.7)                            | 305.7 (285.4, 328.8)    | 240 (218, 272)                                  | 310.1 (284.6, 329)      | 226.9 (204.1, 244.7)                              | 295.9 (274.5, 336.8)    | 223.9 (216.1, 242.6)                                   | 295.1 (266.8, 319.9)    |
| End-stage renal disease                                                                                    | 769.6 (725.7, 805.1)                            | 881.7 (840, 920.7)      | 839.7 (807.3, 869.3)                            | 955 (917.6, 989.4)      | 980.9 (929.3, 1027.6)                           | 1110.5 (1065.5, 1155.8) | 710.6 (670.4, 741.9)                              | 810.3 (785.6, 871.6)    | 594.4 (565.2, 636)                                     | 687.5 (649.9, 731.5)    |

|                                                                                     |                                        |                                     |                                        |                                        |                                      |                                        |                                        |                                    |                                        |                                        |
|-------------------------------------------------------------------------------------|----------------------------------------|-------------------------------------|----------------------------------------|----------------------------------------|--------------------------------------|----------------------------------------|----------------------------------------|------------------------------------|----------------------------------------|----------------------------------------|
| Ulcer                                                                               | 267.3<br>(236.9,<br>288.1)             | 260.4<br>(243,<br>284.4)            | 263.7<br>(237.4,<br>297.7)             | 245.1<br>(217.5,<br>262.8)             | 222.2<br>(197.2,<br>257.8)           | 200.1<br>(177.4,<br>218.7)             | 308.4<br>(256.1,<br>347.6)             | 291.3<br>(278.9,<br>307.9)         | 414.9<br>(353.1,<br>457.5)             | 389.7<br>(357.2,<br>425.7)             |
| Deaths averted per 100,000 people with type II diabetes from 10 years of treatment: | 1399.2<br>(1358.2,<br>1441.1)          | 2051.7<br>(2010.2,<br>2098.6)       | 1447.8<br>(1399.6,<br>1510.7)          | 1957.7<br>(1910.3,<br>2025.7)          | 1602.9<br>(1550.1,<br>1651.8)        | 2214.7<br>(2145.5,<br>2291.7)          | 1426.9<br>(1381.3,<br>1478.0)          | 2008.8<br>(1963.7,<br>2069.1)      | 1415<br>(1368.0,<br>1467.6)            | 2000.1<br>(1950.8,<br>2051.3)          |
| Number needed to treat to prevent one macrovascular event                           | 25 (24.4,<br>26.2)                     | 16 (15.7,<br>16.3)                  | 24.3 (23.5,<br>25.3)                   | 17.1 (16.5,<br>17.5)                   | 22.9 (22.1,<br>23.5)                 | 15.4 (15,<br>15.8)                     | 24.7 (15.9,<br>16.6)                   | 16.1<br>(15.7,<br>16.4)            | 24 (23,<br>24.5)                       | 15.8 (15.5,<br>16.1)                   |
| Number needed to treat to prevent one microvascular event                           | 63.5 (60.4,<br>68.3)                   | 57.1 (54,<br>60.1)                  | 73.6 (69.3,<br>78.2)                   | 64.5 (61.5,<br>68.4)                   | 68.8 (63.8,<br>73.8)                 | 60.5 (57.6,<br>64.2)                   | 87.7 (67.3,<br>75.2)                   | 69.1<br>(63.8, 72)                 | 80.5 (74.2,<br>87.4)                   | 70.3 (65.4,<br>75.7)                   |
| <b>Cost and cost-effectiveness:</b>                                                 |                                        |                                     |                                        |                                        |                                      |                                        |                                        |                                    |                                        |                                        |
| Total costs, per capita per year, \$US 2016                                         | \$890.8<br>(\$876.9,<br>\$906.5)       | \$886.8<br>(\$871.2,<br>\$901)      | \$725.1<br>(\$717.6,<br>\$735.5)       | \$724.6<br>(\$717.7,<br>\$736)         | \$952.4<br>(\$947.1,<br>\$958.8)     | \$952.5<br>(\$946.3,<br>\$958.3)       | \$1019.8<br>(\$1005.5,<br>\$1035.4)    | \$1012.4<br>(\$997.8,<br>\$1028.1) | \$517.3<br>(\$508.5,<br>\$531)         | \$512.8<br>(\$507.6,<br>\$517.3)       |
| Total DALYs averted, per capita per year                                            | 0.085<br>(0.083,<br>0.087)             | 0.123<br>(0.121,<br>0.124)          | 0.043<br>(0.042,<br>0.045)             | 0.06 (0.059,<br>0.061)                 | 0.063<br>(0.062,<br>0.065)           | 0.088<br>(0.087,<br>0.089)             | 0.093<br>(0.091,<br>0.095)             | 0.127<br>(0.125,<br>0.129)         | 0.031<br>(0.031,<br>0.032)             | 0.047<br>(0.046,<br>0.048)             |
| \$/DALYs averted (average cost-effectiveness, compared to no treatment)             | \$10581.2<br>(\$10531.9,<br>\$10593.7) | \$7215.9<br>(\$7209.5,<br>\$7254.9) | \$16995.3<br>(\$16798.3,<br>\$17073.9) | \$12038.8<br>(\$11978.3,<br>\$12106.3) | \$15142.6<br>(\$15009,<br>\$15289.5) | \$10769.1<br>(\$10728.3,<br>\$10840.7) | \$11149.3<br>(\$11013.8,<br>\$11150.0) | \$7941.9<br>(\$7933.1,<br>\$7966)  | \$16298.9<br>(\$16266.4,<br>\$16409.8) | \$10928.4<br>(\$10754.1,<br>\$11017.3) |
| Incremental cost-effectiveness of shifting from TTT to BTT                          | \$-102.6 (-117.6, -97.6)               |                                     | \$-29.4 (-35.7, -26.3)                 |                                        |                                      | \$4 (3.7, 4.5)                         |                                        | \$-217.6 (-246.7, -194.7)          |                                        | \$-281.3 (-321.4, -264.7)              |

Appendix Table 8

Modifying the BTT treatment thresholds to match the same total population size treated as the TTT strategy. The minimal proportionate change in each BTT threshold (CVD/microvascular) from the base case (10% 10-year risk/5.0% lifetime risk) was found to match the total population size. CVD/microvascular treatment thresholds to match the TTT population size treated, rounded to the nearest 0.5%, were 8.0% for 10-year CVD risk and 4.0% for lifetime microvascular risk.

|                                                                                                            | China<br>(type II diabetes prevalence ~9.3%) |                         | Ghana<br>(type II diabetes prevalence ~2.2%) |                         | India<br>(type II diabetes prevalence ~8.8%) |                         | Mexico<br>(type II diabetes prevalence ~15.0%) |                         | South Africa<br>(type II diabetes prevalence ~7.2%) |                         |
|------------------------------------------------------------------------------------------------------------|----------------------------------------------|-------------------------|----------------------------------------------|-------------------------|----------------------------------------------|-------------------------|------------------------------------------------|-------------------------|-----------------------------------------------------|-------------------------|
|                                                                                                            | TTT                                          | BTT                     | TTT                                          | BTT                     | TTT                                          | BTT                     | TTT                                            | BTT                     | TTT                                                 | BTT                     |
| Adults with type II diabetes recommended any treatment, %:                                                 | 99.1 (99.0, 99.1)                            | 99.1 (99.0, 99.1)       | 99.4 (99.3, 99.4)                            | 99.4 (99.3, 99.4)       | 99.3 (99.2, 99.4)                            | 99.3 (99.2, 99.4)       | 99.2 (99.2, 99.3)                              | 99.2 (99.2, 99.3)       | 99.3 (99.2, 99.3)                                   | 99.3 (99.2, 99.3)       |
| Blood pressure treatment                                                                                   | 80.5 (80.3, 80.6)                            | 87.7 (87.6, 87.8)       | 86.4 (86.3, 86.6)                            | 86.7 (86.5, 86.8)       | 85.4 (85.2, 85.5)                            | 87.2 (87, 87.3)         | 84.1 (83.9, 84.2)                              | 91.3 (91.1, 91.4)       | 84.1 (83.8, 84.3)                                   | 86.7 (86.6, 86.9)       |
| Lipid treatment                                                                                            | 75.2 (75.1, 75.5)                            | 88 (87.9, 88.1)         | 75.4 (75.2, 75.6)                            | 86.8 (86.7, 87)         | 75.3 (75.1, 75.6)                            | 87.4 (87.2, 87.5)       | 75.3 (75.2, 75.5)                              | 91.5 (91.4, 91.6)       | 75.3 (75, 75.5)                                     | 86.9 (86.8, 87.1)       |
| Glycaemic treatment                                                                                        | 80.7 (80.5, 80.9)                            | 96.1 (96, 96.2)         | 80.7 (80.6, 80.9)                            | 97.1 (97, 97.1)         | 80.7 (80.6, 80.9)                            | 96.8 (96.8, 96.9)       | 80.7 (80.5, 80.9)                              | 97.4 (97.3, 97.5)       | 80.8 (80.6, 81)                                     | 95.3 (95.2, 95.4)       |
| Insulin treatment                                                                                          | 13.8 (13.7, 13.9)                            | 18.8 (18.6, 19.1)       | 13.8 (13.7, 14)                              | 19.6 (19.5, 19.8)       | 13.8 (13.7, 14)                              | 20.2 (19.9, 20.4)       | 13.8 (13.5, 13.9)                              | 20 (19.9, 20.2)         | 13.8 (13.7, 14)                                     | 16.6 (16.4, 16.8)       |
| number of medications, per person recommended treatment                                                    | 3 (3, 3.1)                                   | 3.8 (3.8, 3.8)          | 3.3 (3.3, 3.3)                               | 3.7 (3.7, 3.7)          | 3.2 (3.2, 3.3)                               | 3.9 (3.9, 3.9)          | 3.2 (3.2, 3.2)                                 | 3.9 (3.8, 3.9)          | 3.2 (3.2, 3.2)                                      | 3.8 (3.8, 3.8)          |
| <b>CVD events prevented per 100,000 people with type II diabetes from 10 years of treatment:</b>           |                                              |                         |                                              |                         |                                              |                         |                                                |                         |                                                     |                         |
| MI                                                                                                         | 2098.4 (2005.4, 2146.1)                      | 3276.7 (3167.9, 3296)   | 2206.5 (2133.2, 2268.7)                      | 3122.4 (3067.8, 3150.4) | 2290.4 (2229.6, 2356)                        | 3417.2 (3362.6, 3532.7) | 2201.1 (2125.5, 2311.4)                        | 3293.9 (3242.4, 3365.9) | 2200.8 (2111.3, 2309.9)                             | 3397 (3336.2, 3390.6)   |
| Stroke                                                                                                     | 1857.3 (1771.5, 1914.8)                      | 2850.7 (2729.1, 2899.7) | 1885.3 (1790.5, 1966)                        | 2656.9 (2586.3, 2754.1) | 2054.4 (1986.8, 2134.1)                      | 2999.7 (2893.8, 3099.5) | 1932 (1886, 1982.2)                            | 2815.2 (2772.8, 2855.8) | 1941.5 (1881.5, 1995.6)                             | 2873.2 (2825.7, 2945.1) |
| <b>Microvascular events prevented per 100,000 people with type II diabetes from 10 years of treatment:</b> |                                              |                         |                                              |                         |                                              |                         |                                                |                         |                                                     |                         |
| Blindness                                                                                                  | 229.4 (214.2, 240)                           | 309.4 (275.3, 328.3)    | 244.1 (228, 264.8)                           | 308.4 (287.9, 331.6)    | 238.2 (219.6, 270)                           | 315.3 (282.2, 338.3)    | 225.2 (205.6, 242.9)                           | 303.7 (272, 326.2)      | 222.3 (204.9, 243.7)                                | 311.4 (287.9, 331.7)    |

|                                                                                     |                                  |                               |                              |                                  |                                |                                |                                |                               |                                  |                                  |
|-------------------------------------------------------------------------------------|----------------------------------|-------------------------------|------------------------------|----------------------------------|--------------------------------|--------------------------------|--------------------------------|-------------------------------|----------------------------------|----------------------------------|
| End-stage renal disease                                                             | 764 (731.1, 799.2)               | 885.7 (852.6, 902.9)          | 833.5 (813.3, 862.9)         | 957.1 (896.4, 995.6)             | 973.7 (936.2, 1020.1)          | 1124.3 (1081.9, 1166.4)        | 705.4 (675.4, 736.4)           | 810.8 (786.1, 872.2)          | 590 (559, 614.6)                 | 702.9 (678.6, 772.5)             |
| Ulcer                                                                               | 265.3 (238.7, 286)               | 262.2 (241.3, 282.5)          | 261.8 (239.1, 295.5)         | 249.5 (212.4, 277.3)             | 220.6 (198.7, 256)             | 209.7 (193.3, 236)             | 306.1 (258, 345.1)             | 291.5 (279.1, 308.1)          | 411.9 (369.9, 442.6)             | 394.8 (360.7, 429.2)             |
| Deaths averted per 100,000 people with type II diabetes from 10 years of treatment: | 1409.8 (1346.0, 1454.3)          | 2068.7 (1988.5, 2097.5)       | 1467.9 (1409.6, 1522.3)      | 1990.1 (1829.7, 2046.3)          | 1596.8 (1545.0, 1657.7)        | 2237.4 (2171.2, 2314.4)        | 1439.3 (1394.2, 1493.5)        | 2032.1 (1994.4, 2078.9)       | 1404.5 (1351.1, 1457.3)          | 2034.9 (1958.0, 2099.0)          |
| Number needed to treat to prevent one CVD event                                     | 25 (24.4, 26.2)                  | 16.3 (15.7, 16.3)             | 24.3 (23.5, 25.3)            | 17.3 (17, 17.7)                  | 22.9 (22.1, 23.5)              | 15.6 (15.1, 16)                | 24 (23.1, 24.7)                | 16.3 (16, 16.5)               | 24 (23.1, 24.8)                  | 16.1 (16, 16.4)                  |
| Number needed to treat to prevent one microvascular event                           | 64.0 (60.8, 67.8)                | 69.4 (67.2, 70.5)             | 74.2 (69.8, 77.6)            | 66.2 (62.5, 71.8)                | 69.3 (64.3, 73.3)              | 60.6 (57.5, 64.2)              | 80.2 (74.9, 87.1)              | 70.6 (65.9, 74.2)             | 81.1 (76.3, 87.5)                | 71.8 (65.9, 76.2)                |
| <b>Cost and cost-effectiveness:</b>                                                 |                                  |                               |                              |                                  |                                |                                |                                |                               |                                  |                                  |
| Total costs, per capita per year, \$US 2016                                         | \$891.1 (\$876.6, \$906.7)       | \$899.4 (\$881.9, \$905.2)    | \$725.4 (\$717.4, \$735.8)   | \$735.1 (\$727.2, \$741.9)       | \$952.6 (\$946.8, \$959)       | \$962.9 (\$953.1, \$972.5)     | \$1020.1 (\$1005.3, \$1035.6)  | \$1015 (\$1003.8, \$1022.9)   | \$517.6 (\$513.3, \$522.7)       | \$526 (\$517.3, \$533.2)         |
| Total DALYs averted, per capita per year                                            | 0.085 (0.083, 0.087)             | 0.124 (0.121, 0.126)          | 0.043 (0.042, 0.045)         | 0.061 (0.06, 0.063)              | 0.063 (0.062, 0.065)           | 0.09 (0.087, 0.092)            | 0.093 (0.091, 0.095)           | 0.129 (0.127, 0.13)           | 0.031 (0.031, 0.032)             | 0.047 (0.046, 0.048)             |
| \$/DALYs averted (average cost-effectiveness, compared to no treatment)             | \$10448.7 (\$10314.3, \$10453.1) | \$7269.4 (\$7158.5, \$7318.0) | \$16710.4 (\$16327, \$17094) | \$12009.8 (\$11812.2, \$12100.7) | \$15124.1 (\$14800.2, \$15385) | \$10755 (\$10586.9, \$10964.5) | \$11019 (\$10897.4, \$11062.4) | \$7891.1 (\$7861.4, \$7901.5) | \$16448.0 (\$16168.6, \$16728.4) | \$11075.4 (\$11010.0, \$11320.0) |
| Incremental cost-effectiveness of shifting from TTT to BTT                          | \$212.8 (193, 244.1)             |                               | \$538.9 (461.9, 646.7)       |                                  |                                | \$381.5 (343.3, 468.2)         |                                | -\$141.7 (-159.4, -130.8)     |                                  | \$525 (494.1, 600)               |

Appendix Table 9

Treatment outcomes if insulin were unavailable.

|                                                                                                            | China<br>(type II diabetes<br>prevalence ~9.3%) |                         | Ghana<br>(type II diabetes<br>prevalence ~2.2%) |                         | India<br>(type II diabetes<br>prevalence ~8.8%) |                         | Mexico<br>(type II diabetes<br>prevalence ~15.0%) |                         | South Africa<br>(type II diabetes<br>prevalence ~7.2%) |                         |
|------------------------------------------------------------------------------------------------------------|-------------------------------------------------|-------------------------|-------------------------------------------------|-------------------------|-------------------------------------------------|-------------------------|---------------------------------------------------|-------------------------|--------------------------------------------------------|-------------------------|
|                                                                                                            | TTT                                             | BTT                     | TTT                                             | BTT                     | TTT                                             | BTT                     | TTT                                               | BTT                     | TTT                                                    | BTT                     |
| Adults with type II diabetes recommended any treatment, %:                                                 | 99.1 (99.0, 99.1)                               | 97.0 (97.0, 97.1)       | 99.4 (99.3, 99.4)                               | 97.2 (97.1, 97.2)       | 99.3 (99.2, 99.4)                               | 98.1 (98, 98.1)         | 99.2 (99.2, 99.3)                                 | 96.6 (96.4, 96.7)       | 99.3 (99.2, 99.3)                                      | 96.4 (96.4, 96.5)       |
| Blood pressure treatment                                                                                   | 80.5 (80.3, 80.6)                               | 82.5 (82.2, 82.7)       | 86.4 (86.3, 86.6)                               | 81 (80.9, 81.1)         | 85.4 (85.2, 85.5)                               | 84.4 (84.2, 84.5)       | 84.1 (83.9, 84.2)                                 | 82.3 (82.2, 82.5)       | 84.1 (83.8, 84.3)                                      | 82.7 (82.5, 82.8)       |
| Lipid treatment                                                                                            | 75.2 (75.1, 75.5)                               | 82.8 (82.5, 83)         | 75.4 (75.2, 75.6)                               | 81.2 (81, 81.3)         | 75.3 (75.1, 75.6)                               | 84.5 (84.3, 84.7)       | 75.3 (75.2, 75.5)                                 | 82.5 (82.4, 82.7)       | 75.3 (75, 75.5)                                        | 82.9 (82.7, 83)         |
| Glycaemic treatment                                                                                        | 80.8 (80.5, 81)                                 | 92.8 (92.7, 92.9)       | 80.7 (80.5, 80.9)                               | 93.8 (93.8, 93.9)       | 80.8 (80.5, 81)                                 | 95.1 (95, 95.2)         | 80.7 (80.7, 80.8)                                 | 92.1 (92, 92.3)         | 80.8 (80.5, 80.9)                                      | 91.9 (91.7, 92)         |
| Insulin treatment                                                                                          | -                                               | -                       | -                                               | -                       | -                                               | -                       | -                                                 | -                       | -                                                      | -                       |
| number of medications, per person recommended treatment                                                    | 3.0 (3.0, 3.0)                                  | 3.5 (3.5, 3.5)          | 3.2 (3.2, 3.2)                                  | 3.4 (3.4, 3.4)          | 3.2 (3.2, 3.2)                                  | 3.6 (3.6, 3.6)          | 3.1 (3.1, 3.1)                                    | 3.5 (3.5, 3.5)          | 3.1 (3.1, 3.1)                                         | 3.5 (3.5, 3.5)          |
| <b>CVD events prevented per 100,000 people with type II diabetes from 10 years of treatment:</b>           |                                                 |                         |                                                 |                         |                                                 |                         |                                                   |                         |                                                        |                         |
| MI                                                                                                         | 2076.6 (2016.7, 2148)                           | 3217.1 (3133.1, 3340.3) | 2195.6 (2145.1, 2246.8)                         | 3079.0 (2996.6, 3132.0) | 2350 (2304.8, 2398.9)                           | 3419.7 (3302.2, 3537.1) | 2190.8 (2111.1, 2269.5)                           | 3204.7 (3095.4, 3273.8) | 2220 (2136.8, 2317.4)                                  | 3268.5 (3220.4, 3337.2) |
| Stroke                                                                                                     | 1830.3 (1761.8, 1917.4)                         | 2834.0 (2735.5, 2872.5) | 1893.6 (1856.9, 1937.8)                         | 2803.5 (2706.5, 2806.2) | 2029.7 (1965.9, 2131.5)                         | 2964.6 (2951.8, 3050.2) | 1900.5 (1861.9, 1977.5)                           | 2775.9 (2738.5, 2829.8) | 1931.3 (1856.7, 1990.6)                                | 2805.3 (2767.7, 2852.3) |
| <b>Microvascular events prevented per 100,000 people with type II diabetes from 10 years of treatment:</b> |                                                 |                         |                                                 |                         |                                                 |                         |                                                   |                         |                                                        |                         |
| Blindness                                                                                                  | 200.2 (180.9, 218.1)                            | 170.9 (156.2, 187.8)    | 207 (189.8, 220.6)                              | 178.2 (154.9, 190.8)    | 207.7 (192, 223.8)                              | 171.9 (154.9, 189)      | 205.4 (180.7, 222.8)                              | 167.8 (155.5, 187)      | 205.6 (186.6, 224.1)                                   | 174.5 (159.9, 188)      |
| End-stage renal disease                                                                                    | 732.7 (678.9, 783.5)                            | 516.5 (484, 549.1)      | 768.8 (723, 804.9)                              | 542.3 (498.2, 602.5)    | 914.1 (866, 950.7)                              | 641.2 (588.5, 680.1)    | 654.8 (632.5, 670.3)                              | 456.2 (407.8, 495.9)    | 569.9 (538.2, 598.4)                                   | 395.0 (373.6, 451.9)    |
| Ulcer                                                                                                      | 262.4 (243.2, 288.9)                            | 189.4 (170.9, 209.3)    | 245.9 (230.7, 258.8)                            | 188.4 (177.2, 208.6)    | 217.1 (195.9, 233.5)                            | 158.3 (144.6, 179.2)    | 290.6 (263.8, 314.5)                              | 223.3 (206.7, 238.2)    | 388.9 (365.4, 405.9)                                   | 296.3 (264.5, 316.7)    |



|                                                                                     |                                        |                                     |                                        |                                        |                                        |                                        |                                        |                                     |                                        |                                        |
|-------------------------------------------------------------------------------------|----------------------------------------|-------------------------------------|----------------------------------------|----------------------------------------|----------------------------------------|----------------------------------------|----------------------------------------|-------------------------------------|----------------------------------------|----------------------------------------|
| Deaths averted per 100,000 people with type II diabetes from 10 years of treatment: | 1384.0<br>(1326.3,<br>1450.1)          | 1915.8<br>(1849.5,<br>1968.4)       | 1445.0<br>(1404.0,<br>1485.4)          | 1884.4<br>(1815.1,<br>1918.8)          | 1579.0<br>(1528.2,<br>1640.4)          | 2050.6<br>(2001.5,<br>2121.5)          | 1407.0<br>(1367.1,<br>1458.3)          | 1871.2<br>(1816.4,<br>1920.3)       | 1397.0<br>(1339.9,<br>1450.2)          | 1875.8<br>(1843.2,<br>1928.6)          |
| Number needed to treat to prevent one CVD event                                     | 25.4 (24.4,<br>26.2)                   | 16.0<br>(15.6,<br>16.5)             | 24.3 (23.8,<br>24.8)                   | 17.0 (16.7,<br>17.5)                   | 22.4 (21.9,<br>22.9)                   | 15.3 (14.8,<br>15.8)                   | 24.3 (23.4,<br>25)                     | 16.2<br>(15.8,<br>16.6)             | 23.9 (23,<br>24.8)                     | 15.9 (15.6,<br>16.1)                   |
| Number needed to treat to prevent one microvascular event                           | 67.3 (62.5,<br>72.8)                   | 94.1<br>(87.4,<br>101.4)            | 81.3 (77.4,<br>86.9)                   | 106.9 (97,<br>116.9)                   | 74.2 (70.5,<br>79.1)                   | 101.0<br>(93.6,<br>110.4)              | 86.2 (82.2,<br>92.1)                   | 114.0<br>(105,<br>125.5)            | 85.2 (80.8,<br>91)                     | 111.5<br>(101.0,<br>120.8)             |
| <b>Cost and cost-effectiveness:</b>                                                 |                                        |                                     |                                        |                                        |                                        |                                        |                                        |                                     |                                        |                                        |
| Total costs, per capita per year, \$US 2016                                         | \$899<br>(\$891.3,<br>\$915.4)         | \$924.3<br>(\$914.2,<br>\$938.5)    | \$729.7<br>(\$724.1,<br>\$735.8)       | \$752.5<br>(\$745,<br>\$760.6)         | \$960.7<br>(\$950.3,<br>\$968.9)       | \$991.2<br>(\$980.5,<br>\$1000.1)      | \$1026.6<br>(\$1017.5,<br>\$1036)      | \$1052<br>(\$1042,<br>\$1058.1)     | \$521.7<br>(\$514.4,<br>\$533.1)       | \$536<br>(\$528,<br>\$548.5)           |
| Total DALYs averted, per capita per year                                            | 0.084<br>(0.081,<br>0.086)             | 0.114<br>(0.111,<br>0.116)          | 0.043<br>(0.042,<br>0.044)             | 0.057<br>(0.055,<br>0.059)             | 0.063<br>(0.062,<br>0.065)             | 0.083<br>(0.081,<br>0.086)             | 0.091<br>(0.088,<br>0.093)             | 0.118<br>(0.117,<br>0.12)           | 0.031<br>(0.03,<br>0.032)              | 0.045<br>(0.044,<br>0.045)             |
| \$/DALYs averted (average cost-effectiveness, compared to no treatment)             | \$10747.2<br>(\$10663.7,<br>\$10942.3) | \$8131.5<br>(\$8101.1,<br>\$8216.0) | \$17056.2<br>(\$16834.9,<br>\$17235.8) | \$13185.3<br>(\$12975.3,<br>\$13569.1) | \$15203.0<br>(\$14910.9,<br>\$15409.1) | \$11892.1<br>(\$11649.1,<br>\$12064.9) | \$11342.4<br>(\$11111.7,<br>\$11516.0) | \$8907.0<br>(\$8843.3,<br>\$8938.6) | \$16869.4<br>(\$16721.6,<br>\$16998.6) | \$12019.5<br>(\$11946.8,<br>\$12108.6) |
| Incremental cost-effectiveness of shifting from TTT to BTT                          | \$843.3 (722.9, 1012)                  |                                     | \$1628.6 (1341.2, 1753.8)              |                                        | \$1525 (1270.8, 1906.3)                |                                        | \$940.7 (793.8, 1058.3)                |                                     | \$1021.4 (953.3, 1100)                 |                                        |

Appendix Table 10

Treatment outcomes if BTT microvascular treatment guidelines had 10% lower adherence from practitioners than the TTT approach.

|                                                                                                            | China (type II diabetes prevalence ~9.3%) |                         | Ghana (type II diabetes prevalence ~2.2%) |                         | India (type II diabetes prevalence ~8.8%) |                         | Mexico (type II diabetes prevalence ~15.0%) |                         | South Africa (type II diabetes prevalence ~7.2%) |                         |
|------------------------------------------------------------------------------------------------------------|-------------------------------------------|-------------------------|-------------------------------------------|-------------------------|-------------------------------------------|-------------------------|---------------------------------------------|-------------------------|--------------------------------------------------|-------------------------|
|                                                                                                            | TTT                                       | BTT                     | TTT                                       | BTT                     | TTT                                       | BTT                     | TTT                                         | BTT                     | TTT                                              | BTT                     |
| Adults with type II diabetes recommended any treatment, %:                                                 | 99.1 (99, 99.1)                           | 97.0 (97.0, 97.1)       | 99.4 (99.3, 99.4)                         | 97.2 (97.1, 97.2)       | 99.3 (99.2, 99.4)                         | 98.1 (98, 98.1)         | 99.2 (99.2, 99.3)                           | 96.6 (96.4, 96.7)       | 99.3 (99.2, 99.3)                                | 96.4 (96.4, 96.5)       |
| Blood pressure treatment                                                                                   | 80.5 (80.3, 80.6)                         | 82.5 (82.2, 82.7)       | 86.4 (86.3, 86.6)                         | 81.0 (80.9, 81.1)       | 85.4 (85.2, 85.5)                         | 84.4 (84.2, 84.5)       | 84.1 (83.9, 84.2)                           | 82.3 (82.2, 82.5)       | 84.1 (83.8, 84.3)                                | 82.7 (82.5, 82.8)       |
| Lipid treatment                                                                                            | 75.2 (75.1, 75.5)                         | 82.5 (82.5, 83.0)       | 75.4 (75.2, 75.6)                         | 81.2 (81, 81.3)         | 75.3 (75.1, 75.6)                         | 84.5 (84.3, 84.7)       | 75.3 (75.2, 75.5)                           | 82.5 (82.4, 82.7)       | 75.3 (75, 75.5)                                  | 82.9 (82.7, 83.0)       |
| Glycaemic treatment                                                                                        | 80.7 (80.5, 80.9)                         | 92.7 (92.7, 92.9)       | 80.7 (80.6, 80.9)                         | 93.8 (93.7, 94.0)       | 80.7 (80.6, 80.9)                         | 95.1 (95, 95.2)         | 80.7 (80.5, 80.9)                           | 92 (91.8, 92.1)         | 80.8 (80.6, 81.0)                                | 91.9 (91.7, 92.0)       |
| Insulin treatment                                                                                          | 13.8 (13.7, 13.9)                         | 16.9 (16.7, 17.1)       | 13.8 (13.7, 14.0)                         | 17.7 (17.5, 17.9)       | 13.8 (13.7, 14.0)                         | 19.3 (19.1, 19.4)       | 13.8 (13.5, 13.9)                           | 16.1 (15.9, 16.3)       | 13.8 (13.7, 14.0)                                | 15.3 (15.2, 15.5)       |
| number of medications, per person recommended treatment                                                    | 3.0 (3.0, 3.1)                            | 3.8 (3.8, 3.8)          | 3.3 (3.3, 3.3)                            | 3.7 (3.7, 3.7)          | 3.2 (3.2, 3.3)                            | 3.8 (3.8, 3.8)          | 3.2 (3.2, 3.2)                              | 3.7 (3.7, 3.8)          | 3.2 (3.2, 3.2)                                   | 3.8 (3.8, 3.8)          |
| <b>CVD events prevented per 100,000 people with type II diabetes from 10 years of treatment:</b>           |                                           |                         |                                           |                         |                                           |                         |                                             |                         |                                                  |                         |
| MI                                                                                                         | 2098.4 (2005.4, 2146.1)                   | 3025.8 (2956.6, 3101.5) | 2206.5 (2133.2, 2268.7)                   | 2896 (2840.3, 3005.9)   | 2290.4 (2229.6, 2356.0)                   | 3186.8 (3134.4, 3262.8) | 2201.1 (2125.5, 2311.4)                     | 3038.3 (2964.6, 3143.1) | 2200.8 (2111.3, 2309.9)                          | 3074.5 (3015.6, 3135.4) |
| Stroke                                                                                                     | 1857.3 (1771.5, 1914.8)                   | 2670.9 (2644.3, 2709.8) | 1885.3 (1790.5, 1966.0)                   | 2439.4 (2386.7, 2516.9) | 2054.4 (1986.8, 2134.1)                   | 2789.6 (2685.8, 2899.9) | 1932.0 (1886.0, 1982.2)                     | 2617.0 (2567.8, 2653.3) | 1941.5 (1881.5, 1995.6)                          | 2679.0 (2623.7, 2731.6) |
| <b>Microvascular events prevented per 100,000 people with type II diabetes from 10 years of treatment:</b> |                                           |                         |                                           |                         |                                           |                         |                                             |                         |                                                  |                         |
| Blindness                                                                                                  | 229.4 (214.2, 240.0)                      | 273.2 (257.8, 294.4)    | 244.1 (228.0, 264.8)                      | 275.1 (256.8, 295.9)    | 238.2 (219.6, 270.0)                      | 279.1 (256.1, 296.1)    | 225.2 (205.6, 242.9)                        | 266.3 (247.0, 303.1)    | 222.3 (204.9, 243.7)                             | 265.6 (240.1, 287.9)    |
| End-stage renal disease                                                                                    | 764 (731.1, 799.2)                        | 793.5 (756.0, 828.6)    | 833.5 (813.3, 862.9)                      | 859.5 (825.8, 890.5)    | 973.7 (936.2, 1020.1)                     | 999.5 (958.9, 1040.2)   | 705.4 (675.4, 736.4)                        | 729.3 (707.0, 784.4)    | 590 (559.0, 614.6)                               | 618.8 (584.9, 658.4)    |

|                                                                                     |                                         |                                    |                                     |                                         |                                         |                                       |                                       |                                      |                                       |                                       |
|-------------------------------------------------------------------------------------|-----------------------------------------|------------------------------------|-------------------------------------|-----------------------------------------|-----------------------------------------|---------------------------------------|---------------------------------------|--------------------------------------|---------------------------------------|---------------------------------------|
| Ulcer                                                                               | 265.3<br>(238.7,<br>286.0)              | 234.4<br>(218.7,<br>256.0)         | 261.8<br>(239.1,<br>295.5)          | 220.6<br>(195.8,<br>236.5)              | 220.6<br>(198.7,<br>256.0)              | 180.1<br>(159.6,<br>196.8)            | 306.1<br>(258.0,<br>345.1)            | 262.2<br>(251.0,<br>277.1)           | 411.9<br>(369.9,<br>442.6)            | 350.7<br>(321.4,<br>383.1)            |
| Deaths averted per 100,000 people with type II diabetes from 10 years of treatment: | 1409.8<br>(1346.0,145<br>4.3)           | 1915.6<br>(1877.2,<br>1959.2)      | 1467.9<br>(1409.6,<br>1522.3)       | 1826.2<br>(1782.3,<br>1889.6)           | 1596.8<br>(1545.0,<br>1657.7)           | 2065.6<br>(2001.3,<br>2137.4)         | 1439.3<br>(1394.2,<br>1493.5)         | 1876.3<br>(1834.3,<br>1932.1)        | 1404.5<br>(1351.1,<br>1457.3)         | 1869.8<br>(1824.0,<br>1917.2)         |
| Number needed to treat to prevent one CVD event                                     | 25.0 (24.4,<br>26.2)                    | 17.0<br>(16.7,<br>17.3)            | 24.3 (23.5,<br>25.3)                | 18.2 (17.6,<br>18.6)                    | 22.9 (22.1,<br>23.5)                    | 16.4 (15.9,<br>16.8)                  | 24.0 (23.1,<br>24.7)                  | 17.1 (16.7,<br>17.4)                 | 24.0 (23.1,<br>24.8)                  | 16.8 (16.5,<br>17.1)                  |
| Number needed to treat to prevent one microvascular event                           | 64.0 (60.8,<br>67.8)                    | 63.4<br>(60.0,<br>66.7)            | 74.2 (69.8,<br>77.6)                | 71.7 (68.3,<br>76.0)                    | 69.3 (64.3,<br>73.3)                    | 67.2 (64.0,<br>71.3)                  | 80.2 (74.9,<br>87.1)                  | 76.8 (70.9,<br>80.0)                 | 81.1 (76.3,<br>87.5)                  | 78.1 (72.6,<br>84.1)                  |
| <b>Cost and cost-effectiveness:</b>                                                 |                                         |                                    |                                     |                                         |                                         |                                       |                                       |                                      |                                       |                                       |
| Total costs, per capita per year, \$US 2016                                         | \$891.1<br>((\$876.6,<br>\$906.7)       | \$894.7<br>((\$878.7,<br>\$909.4)  | \$725.4<br>((\$717.4,<br>\$735.8)   | \$732.4<br>((\$725.0,<br>\$744.3)       | \$952.6<br>((\$946.8,<br>\$959.0)       | \$960.6<br>((\$953.8,<br>\$966.9)     | \$1020.1<br>((\$1005.3,<br>\$1035.6)  | \$1020.1<br>((\$1005.0,<br>\$1036.7) | \$517.6<br>((\$513.3,<br>\$522.7)     | \$520.5<br>((\$514.7,<br>\$525.5)     |
| Total DALYs averted, per capita per year                                            | 0.085<br>(0.083,<br>0.087)              | 0.104<br>(0.102,<br>0.105)         | 0.043<br>(0.042,<br>0.045)          | 0.051<br>(0.050,<br>0.052)              | 0.063<br>(0.062,<br>0.065)              | 0.075<br>(0.074,<br>0.076)            | 0.093<br>(0.091,<br>0.095)            | 0.108<br>(0.106,<br>0.110)           | 0.031<br>(0.031,<br>0.032)            | 0.04<br>(0.039,<br>0.041)             |
| \$/DALYs averted (average cost-effectiveness, compared to no treatment)             | \$10448.7<br>((\$10453.1,<br>\$10514.3) | \$8587<br>((\$8575.1,<br>\$8639.2) | \$16710.4<br>((\$16327,<br>\$17094) | \$14362.9<br>((\$14299.6,<br>\$14432.3) | \$15124.1<br>((\$14800.2,<br>\$15385.0) | \$12816<br>((\$12774.4,<br>\$12891.4) | \$11019<br>((\$10897.4,<br>\$11062.4) | \$9437.4<br>((\$9348.9,<br>\$9461.4) | \$16448<br>((\$16168.6,<br>\$16728.4) | \$13079.5<br>((\$12886.6,<br>\$13168) |
| Incremental cost-effectiveness of shifting from TTT to BTT                          | \$189.5 (163.6, 240)                    |                                    | \$875 (1000, 1400)                  |                                         | \$666.7 (571.4, 888.9)                  |                                       | \$0 (-15.8, 100)                      |                                      | \$322.2 (290, 414.3)                  |                                       |

Appendix Table 11

Combining the BTT approach for preventing CVD complications with the TTT approach for preventing micro-vascular complications.

|                                                                                                     | China (type II diabetes prevalence ~9.3%) | Ghana (type II diabetes prevalence ~2.2%) | India (type II diabetes prevalence ~8.8%) | Mexico (type II diabetes prevalence ~15.0%) | South Africa (type II diabetes prevalence ~7.2%) |
|-----------------------------------------------------------------------------------------------------|-------------------------------------------|-------------------------------------------|-------------------------------------------|---------------------------------------------|--------------------------------------------------|
| Adults with type II diabetes recommended any treatment, %:                                          | 98.3 (98.2, 98.4)                         | 97.8 (97.7, 97.9)                         | 98.8 (98.6, 98.8)                         | 98.1 (98.1, 98.2)                           | 98.3 (98.2, 98.4)                                |
| Blood pressure treatment                                                                            | 82.6 (82.4, 82.7)                         | 81.9 (81.8, 82.0)                         | 84.4 (84.2, 84.5)                         | 82.4 (82.2, 82.5)                           | 82.8 (82.7, 82.9)                                |
| Lipid treatment                                                                                     | 82.8 (82.7, 83.0)                         | 82.0 (81.9, 82.1)                         | 84.6 (84.4, 84.7)                         | 82.5 (82.4, 82.7)                           | 83.0 (82.9, 83.1)                                |
| Glycemic treatment                                                                                  | 80.8 (80.7, 80.9)                         | 80.8 (80.7, 80.9)                         | 80.7 (80.6, 81)                           | 80.7 (80.5, 80.9)                           | 80.7 (80.6, 80.9)                                |
| Insulin treatment                                                                                   | 13.9 (13.8, 14)                           | 13.9 (13.7, 14)                           | 13.8 (13.6, 14)                           | 13.8 (13.6, 13.9)                           | 13.8 (13.7, 14)                                  |
| number of medications, per person recommended treatment                                             | 3.7 (3.7, 3.7)                            | 3.6 (3.6, 3.6)                            | 3.7 (3.7, 3.7)                            | 3.6 (3.6, 3.6)                              | 3.6 (3.6, 3.6)                                   |
| CVD events prevented per 100,000 people with type II diabetes from 10 years of treatment:           |                                           |                                           |                                           |                                             |                                                  |
| MI                                                                                                  | 3084.9 (3033.6, 3151.3)                   | 2909.3 (2891.1, 3009.6)                   | 2929.6 (2827.7, 3096.3)                   | 3167.1 (2983.2, 3251.5)                     | 3114.2 (3055, 3274.2)                            |
| Stroke                                                                                              | 2719.1 (2676.6, 2852.4)                   | 2439.7 (2301.8, 2560)                     | 2843.1 (2764.5, 2994.3)                   | 2658.7 (2532.3, 2780.3)                     | 2758.3 (2603.1, 2808)                            |
| Microvascular events prevented per 100,000 people with type II diabetes from 10 years of treatment: |                                           |                                           |                                           |                                             |                                                  |
| Blindness                                                                                           | 262.8 (223.5, 302.7)                      | 279.6 (250.1, 299.0)                      | 278.2 (252.7, 313.4)                      | 260.3 (239.0, 288.3)                        | 268.3 (237.6, 291.8)                             |
| End-stage renal disease                                                                             | 867.4 (835.2, 910.8)                      | 920.6 (883.7, 953.1)                      | 1080.2 (1026.6, 1133.0)                   | 775.3 (747.1, 807.9)                        | 661.5 (642.1, 687.6)                             |
| Ulcer                                                                                               | 264.7 (248.9, 306.0)                      | 257.6 (246.7, 307.0)                      | 210.6 (206.5, 252.6)                      | 297.3 (292.7, 336.1)                        | 390.3 (380.9, 456.2)                             |
| Deaths averted per 100,000 people with type II diabetes from 10 years of treatment:                 | 1774.4 (1732.8, 1853.0)                   | 1642 (1575.9, 1715.4)                     | 1798.5 (1737.3, 1903.7)                   | 1766.1 (1672.1, 1839.7)                     | 1791 (1709.8, 1852.5)                            |
| Number needed to treat to prevent one CVD event                                                     | 16.9 (3.8, 17.2)                          | 18.3 (17.6, 18.8)                         | 17.1 (16.2, 17.6)                         | 16.8 (16.3, 17.8)                           | 16.7 (16.2, 17.4)                                |
| Number needed to treat to prevent one microvascular event                                           | 70.5 (64.8, 75.1)                         | 67.1 (62.8, 70.8)                         | 63 (58.2, 66.4)                           | 73.6 (68.6, 76.7)                           | 74.5 (68.5, 77.9)                                |
| Cost and cost-effectiveness                                                                         |                                           |                                           |                                           |                                             |                                                  |
| Total costs, per capita per year, \$US 2016                                                         | \$888.2 (880.0, 896.7)                    | \$724.8 (719.8, 729.6)                    | \$952.5 (948.7, 954.9)                    | \$1014.9 (1007.7, 1025.5)                   | \$514.4 (513.1, 519.6)                           |

|                                                                         |                           |                            |                              |                           |                              |
|-------------------------------------------------------------------------|---------------------------|----------------------------|------------------------------|---------------------------|------------------------------|
| Total DALYs averted, per capita per year                                | 0.110 (0.108, 0.112)      | 0.055 (0.054, 0.056)       | 0.080 (0.079, 0.081)         | 0.116 (0.114, 0.118)      | 0.042 (0.041, 0.043)         |
| \$/DALYs averted (average cost-effectiveness, compared to no treatment) | \$8048.6 (7877.8, 8275.9) | \$13277 (12856.6, 13635.5) | \$11912.6 (11690.5, 12133.1) | \$8761.6 (8541.6, 9011.7) | \$12314.5 (11976.7, 12690.9) |
| Incremental cost-effectiveness of shifting from TTT to BTT              |                           |                            |                              |                           |                              |

**Appendix Figure 1**

Example of a risk chart for lifetime risk of blindness for males newly diagnosed with type II diabetes in China. Lifetime risk is based on the study model. Note that lifetime risk decreases among the 70+ age group due to low life expectancy (i.e., less time left to develop blindness, rather than die of another cause).

| Age (years) | A1c |     |     |     |      | SBP (mmHg) |
|-------------|-----|-----|-----|-----|------|------------|
|             | 6   | 7   | 8   | 9   | 10   |            |
| 70          | 2.6 | 3.1 | 3.7 | 4.3 | 5.1  | 180        |
|             | 2.3 | 2.7 | 3.2 | 3.8 | 4.5  | 160        |
|             | 2.0 | 2.4 | 2.8 | 3.3 | 3.9  | 140        |
|             | 1.7 | 2.1 | 2.5 | 2.9 | 3.4  | 120        |
| 60          | 5.4 | 6.4 | 7.6 | 8.9 | 10.5 | 180        |
|             | 4.8 | 5.6 | 6.6 | 7.8 | 9.2  | 160        |
|             | 4.2 | 4.9 | 5.8 | 6.9 | 8.1  | 140        |
|             | 3.7 | 4.3 | 5.1 | 6.0 | 7.1  | 120        |
| 50          | 5.8 | 6.8 | 8.0 | 9.5 | 11.1 | 180        |
|             | 5.1 | 6.0 | 7.1 | 8.3 | 9.8  | 160        |
|             | 4.4 | 5.2 | 6.2 | 7.3 | 8.6  | 140        |
|             | 3.9 | 4.6 | 5.4 | 6.4 | 7.6  | 120        |
| 40          | 5.1 | 6.1 | 7.1 | 8.4 | 9.9  | 180        |
|             | 4.5 | 5.3 | 6.3 | 7.4 | 8.7  | 160        |
|             | 3.9 | 4.7 | 5.5 | 6.5 | 7.6  | 140        |
|             | 3.4 | 4.1 | 4.8 | 5.7 | 6.7  | 120        |
| 30          | 4.2 | 4.9 | 5.8 | 6.9 | 8.1  | 180        |
|             | 3.6 | 4.3 | 5.1 | 6.0 | 7.1  | 160        |
|             | 3.2 | 3.8 | 4.5 | 5.3 | 6.2  | 140        |
|             | 2.8 | 3.3 | 3.9 | 4.6 | 5.5  | 120        |
| 20          | 3.2 | 3.8 | 4.5 | 5.3 | 6.3  | 180        |
|             | 2.8 | 3.3 | 3.9 | 4.6 | 5.5  | 160        |
|             | 2.5 | 2.9 | 3.4 | 4.1 | 4.8  | 140        |
|             | 2.1 | 2.5 | 3.0 | 3.6 | 4.2  | 120        |

### Appendix Figure 2

Variations in microvascular complications prevented under different thresholds for BTT treatment. Data are from Table 1 and Appendix Tables 5 and 6.

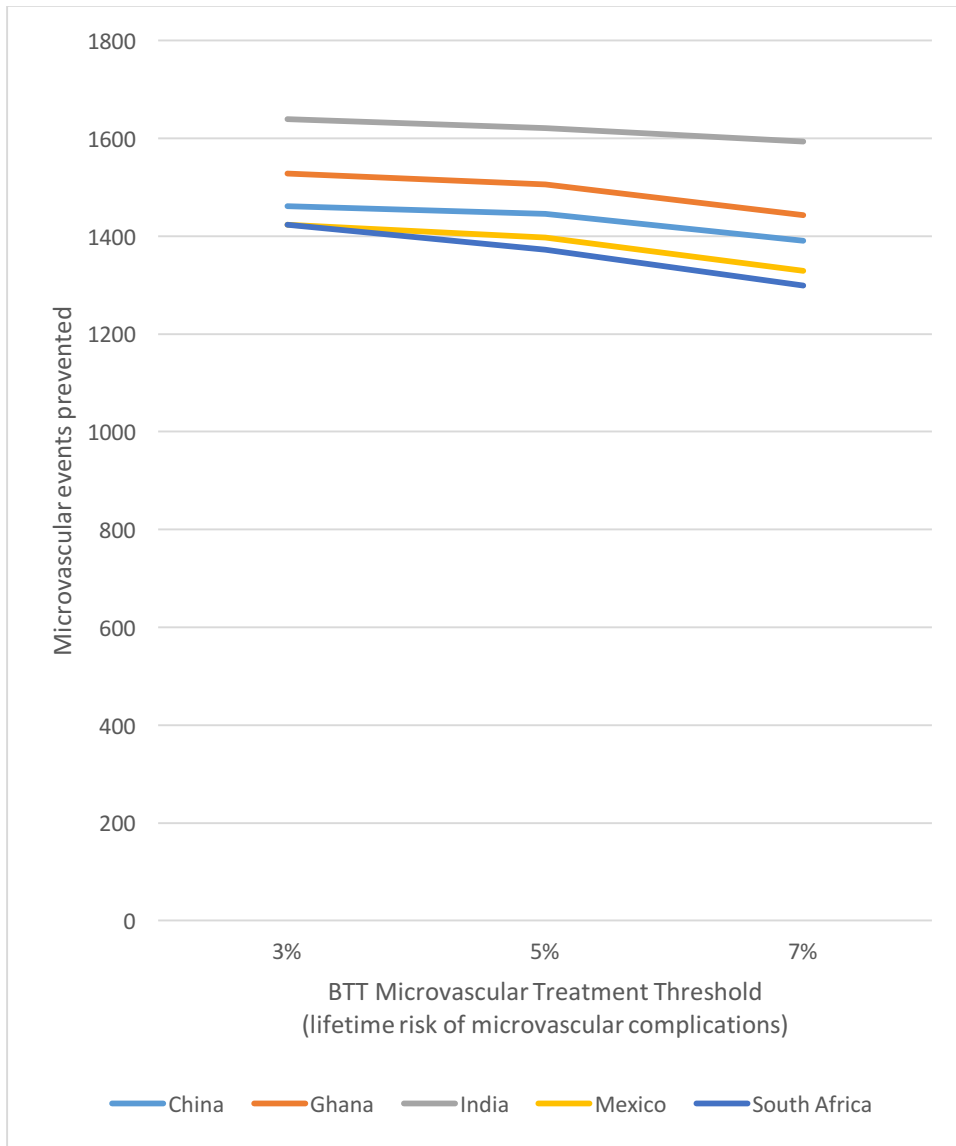

**CHEERS Checklist****Items to include when reporting economic evaluations of health interventions**

The **ISPOR CHEERS Task Force Report**, *Consolidated Health Economic Evaluation Reporting Standards (CHEERS)–Explanation and Elaboration: A Report of the ISPOR Health Economic Evaluations Publication Guidelines Good Reporting Practices Task Force*, provides examples and further discussion of the 24-item CHEERS Checklist and the CHEERS Statement. It may be accessed via the *Value in Health* or via the ISPOR Health Economic Evaluation Publication Guidelines – CHEERS: Good Reporting Practices webpage: <http://www.ispor.org/TaskForces/EconomicPubGuidelines.asp>

| Section/item                    | Item No | Recommendation                                                                                                                                                                             | Reported on page No/line No |
|---------------------------------|---------|--------------------------------------------------------------------------------------------------------------------------------------------------------------------------------------------|-----------------------------|
| <b>Title and abstract</b>       |         |                                                                                                                                                                                            |                             |
| Title                           | 1       | Identify the study as an economic evaluation or use more specific terms such as “cost-effectiveness analysis”, and describe the interventions compared.                                    | <u>1</u>                    |
| Abstract                        | 2       | Provide a structured summary of objectives, perspective, setting, methods (including study design and inputs), results (including base case and uncertainty analyses), and conclusions.    | <u>2</u>                    |
| <b>Introduction</b>             |         |                                                                                                                                                                                            |                             |
| Background and objectives       | 3       | Provide an explicit statement of the broader context for the study.<br>Present the study question and its relevance for health policy or practice decisions.                               | <u>3</u>                    |
| <b>Methods</b>                  |         |                                                                                                                                                                                            |                             |
| Target population and subgroups | 4       | Describe characteristics of the base case population and subgroups analysed, including why they were chosen.                                                                               | <u>4-5</u>                  |
| Setting and location            | 5       | State relevant aspects of the system(s) in which the decision(s) need(s) to be made.                                                                                                       | <u>6</u>                    |
| Study perspective               | 6       | Describe the perspective of the study and relate this to the costs being evaluated.                                                                                                        | <u>7</u>                    |
| Comparators                     | 7       | Describe the interventions or strategies being compared and state why they were chosen.                                                                                                    | <u>6</u>                    |
| Time horizon                    | 8       | State the time horizon(s) over which costs and consequences are being evaluated and say why appropriate.                                                                                   | <u>7</u>                    |
| Discount rate                   | 9       | Report the choice of discount rate(s) used for costs and outcomes and say why appropriate.                                                                                                 | <u>7</u>                    |
| Choice of health outcomes       | 10      | Describe what outcomes were used as the measure(s) of benefit in the evaluation and their relevance for the type of analysis performed.                                                    | <u>5</u>                    |
| Measurement of effectiveness    | 11a     | <i>Single study-based estimates:</i> Describe fully the design features of the single effectiveness study and why the single study was a sufficient source of clinical effectiveness data. | <u>n/a</u>                  |



|                                                        |     |                                                                                                                                                                                                                                                                                                                                                       |     |
|--------------------------------------------------------|-----|-------------------------------------------------------------------------------------------------------------------------------------------------------------------------------------------------------------------------------------------------------------------------------------------------------------------------------------------------------|-----|
|                                                        | 11b | <i>Synthesis-based estimates:</i> Describe fully the methods used for identification of included studies and synthesis of clinical effectiveness data.                                                                                                                                                                                                | 5-6 |
| Measurement and valuation of preference based outcomes | 12  | If applicable, describe the population and methods used to elicit preferences for outcomes.                                                                                                                                                                                                                                                           | 7   |
| Estimating resources and costs                         | 13a | <i>Single study-based economic evaluation:</i> Describe approaches used to estimate resource use associated with the alternative interventions. Describe primary or secondary research methods for valuing each resource item in terms of its unit cost. Describe any adjustments made to approximate to opportunity costs.                           | n/a |
|                                                        | 13b | <i>Model-based economic evaluation:</i> Describe approaches and data sources used to estimate resource use associated with model health states. Describe primary or secondary research methods for valuing each resource item in terms of its unit cost. Describe any adjustments made to approximate to opportunity costs.                           | 7   |
| Currency, price date, and conversion                   | 14  | Report the dates of the estimated resource quantities and unit costs. Describe methods for adjusting estimated unit costs to the year of reported costs if necessary. Describe methods for converting costs into a common currency base and the exchange rate.                                                                                        | 7   |
| Choice of model                                        | 15  | Describe and give reasons for the specific type of decision-analytical model used. Providing a figure to show model structure is strongly recommended.                                                                                                                                                                                                | 5   |
| Assumptions                                            | 16  | Describe all structural or other assumptions underpinning the decision-analytical model.                                                                                                                                                                                                                                                              | 5   |
| Analytical methods                                     | 17  | Describe all analytical methods supporting the evaluation. This could include methods for dealing with skewed, missing, or censored data; extrapolation methods; methods for pooling data; approaches to validate or make adjustments (such as half cycle corrections) to a model; and methods for handling population heterogeneity and uncertainty. | 5-6 |
| <b>Results</b>                                         |     |                                                                                                                                                                                                                                                                                                                                                       |     |
| Study parameters                                       | 18  | Report the values, ranges, references, and, if used, probability distributions for all parameters. Report reasons or sources for distributions used to represent uncertainty where appropriate. Providing a table to show the input values is strongly recommended.                                                                                   | 5-6 |
| Incremental costs and outcomes                         | 19  | For each intervention, report mean values for the main categories of estimated costs and outcomes of interest, as well as mean differences between the comparator groups. If applicable, report incremental cost-effectiveness ratios.                                                                                                                | 7   |
| Characterising uncertainty                             | 20a | <i>Single study-based economic evaluation:</i> Describe the effects of sampling uncertainty for the estimated incremental cost and incremental effectiveness parameters, together with the impact                                                                                                                                                     | n/a |

|                                                                      |     |                                                                                                                                                                                                                                                                            |       |
|----------------------------------------------------------------------|-----|----------------------------------------------------------------------------------------------------------------------------------------------------------------------------------------------------------------------------------------------------------------------------|-------|
|                                                                      |     | of methodological assumptions (such as discount rate, study perspective).                                                                                                                                                                                                  |       |
|                                                                      | 20b | <i>Model-based economic evaluation</i> : Describe the effects on the results of uncertainty for all input parameters, and uncertainty related to the structure of the model and assumptions.                                                                               | 9-10  |
| Characterising heterogeneity                                         | 21  | If applicable, report differences in costs, outcomes, or cost-effectiveness that can be explained by variations between subgroups of patients with different baseline characteristics or other observed variability in effects that are not reducible by more information. | 9-10  |
| <b>Discussion</b>                                                    |     |                                                                                                                                                                                                                                                                            |       |
| Study findings, limitations, generalisability, and current knowledge | 22  | Summarise key study findings and describe how they support the conclusions reached. Discuss limitations and the generalisability of the findings and how the findings fit with current knowledge.                                                                          | 13-14 |
| <b>Other</b>                                                         |     |                                                                                                                                                                                                                                                                            |       |
| Source of funding                                                    | 23  | Describe how the study was funded and the role of the funder in the identification, design, conduct, and reporting of the analysis. Describe other non-monetary sources of support.                                                                                        | 15    |
| Conflicts of interest                                                | 24  | Describe any potential for conflict of interest of study contributors in accordance with journal policy. In the absence of a journal policy, we recommend authors comply with International Committee of Medical Journal Editors recommendations.                          | 15    |

For consistency, the CHEERS Statement checklist format is based on the format of the CONSORT statement checklist

The **ISPOR CHEERS Task Force Report** provides examples and further discussion of the 24-item CHEERS Checklist and the CHEERS Statement. It may be accessed via the *Value in Health* link or via the ISPOR Health Economic Evaluation Publication Guidelines – CHEERS: Good Reporting Practices webpage: <http://www.ispor.org/TaskForces/EconomicPubGuidelines.asp>

The citation for the CHEERS Task Force Report is:

Husereau D, Drummond M, Petrou S, et al. Consolidated health economic evaluation reporting standards (CHEERS)—Explanation and elaboration: A report of the ISPOR health economic evaluations publication guidelines good reporting practices task force. *Value Health* 2013;16:231-50.

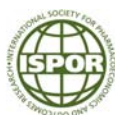

Supplement: NIHMS822125-supplement-1.pdf [file NIHMS822125-supplement-1.pdf]
